# Supplementary material for: Geometric and electronic structure analysis of calcium water complexes with one and two solvation shells
Source: Royal Society of Chemistry journal article supplement (doi:10.1039/d0cp04309e), 2020-01-01
Supplement: d0cp04309e1.pdf [file d0cp04309e1.pdf]

**Electronic Supplementary Information**

**Geometric and electronic structure analysis of calcium water  
complexes with one and two solvation shells**

Isuru R. Ariyaratna and Evangelos Miliordos\*

Department of Chemistry and Biochemistry, Auburn University,  
Auburn, AL 36849, USA

\* To whom correspondence should be addressed. E-mail: [emiliord@auburn.edu](mailto:emiliord@auburn.edu)

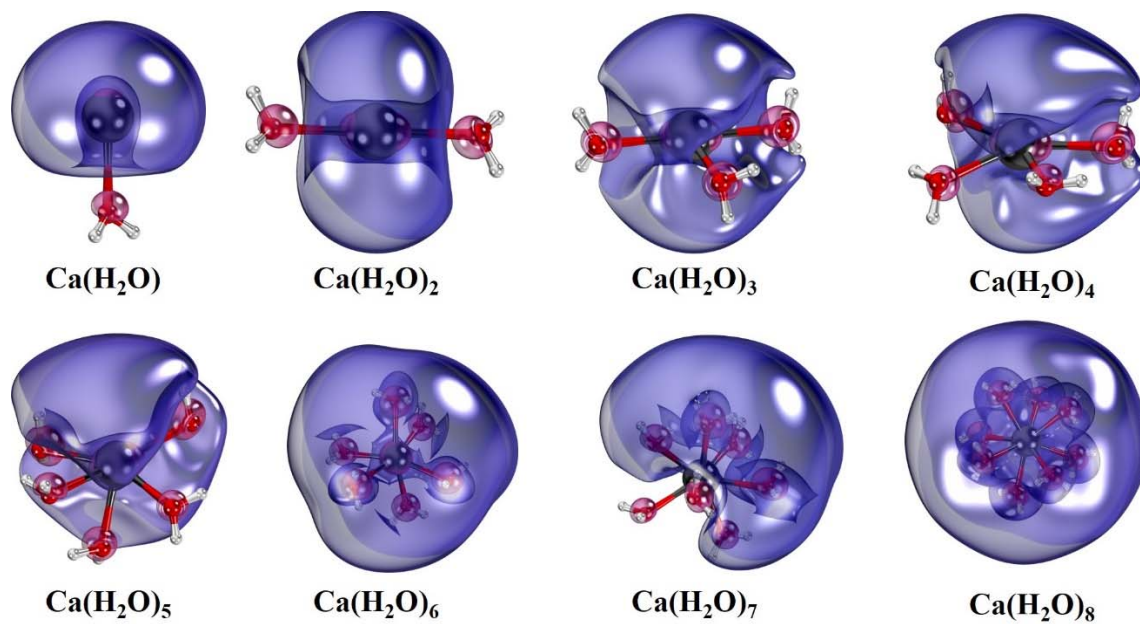

**Figure S1.** Contours of the highest (doubly) occupied molecular orbital of  $\text{Ca}(\text{H}_2\text{O})_{n=1-8}$ .

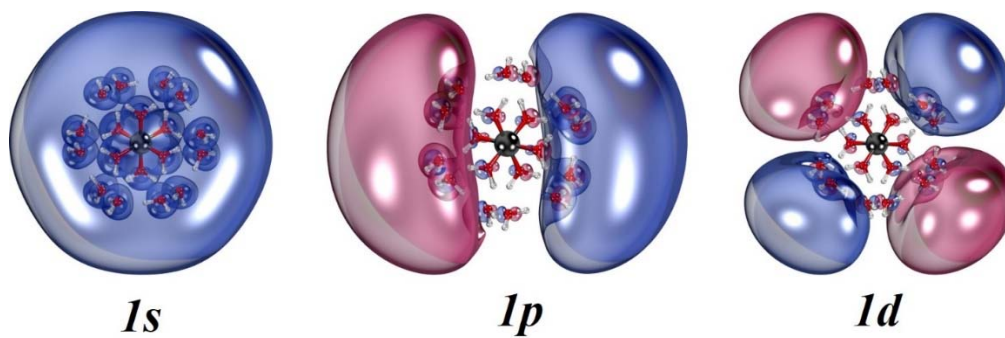

**Figure S2.** Selected  $1s$ ,  $1p$ , and  $1d$  orbitals of the  $\text{Ca}(\text{H}_2\text{O})_6^+@12\text{H}_2\text{O}$ .

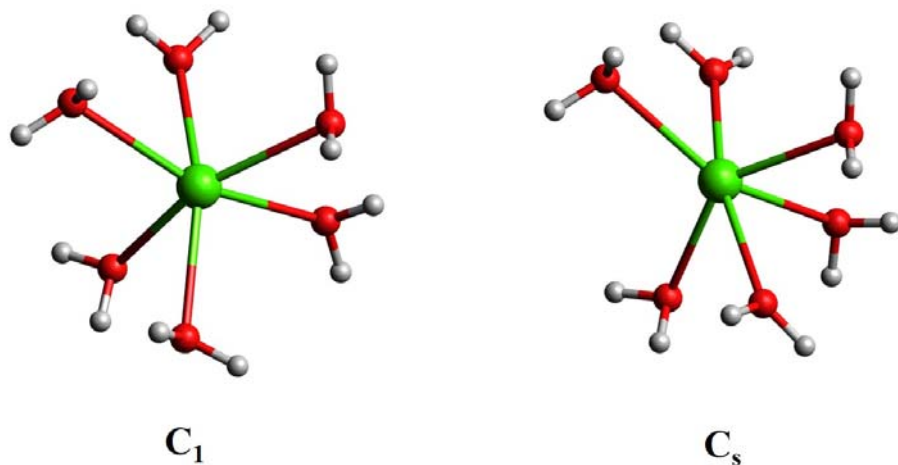

**Figure S3.** Optimized  $\text{Ca}(\text{H}_2\text{O})_6$  structure under  $\text{C}_1$  and  $\text{C}_s$  point groups.

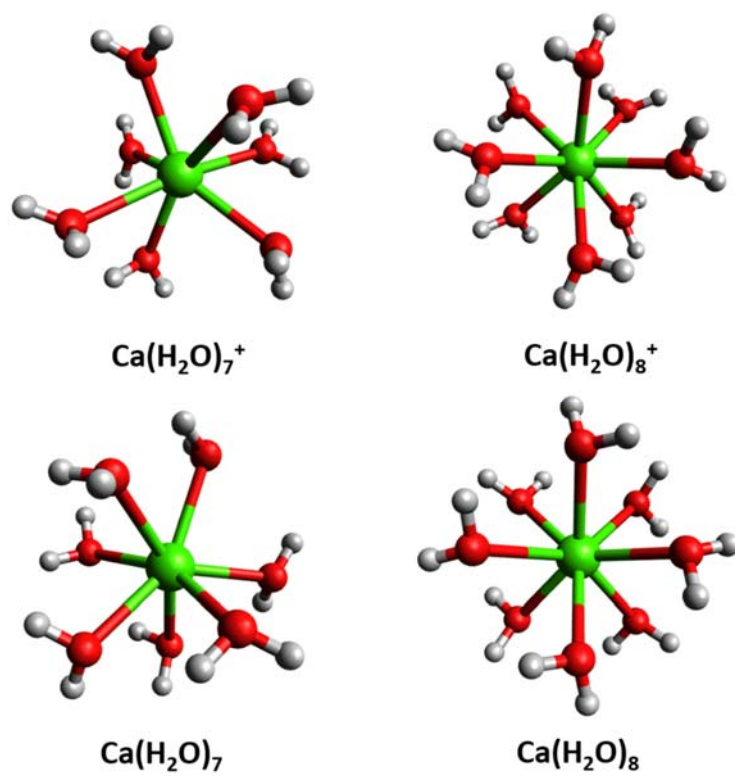

**Figure S4.** Optimized  $\text{Ca}(\text{H}_2\text{O})_{7,8}^{0,+}$  structures.

**Table S1.** MP2 and C-MP2 optimal geometries (coordinates in Å) and total energies (a.u.) of H<sub>2</sub>O and Ca(H<sub>2</sub>O)<sub>n=1-8</sub><sup>+</sup>. The cc-pVTZ(Ca,O) aug-cc-pVTZ(H) basis sets are used for MP2 and cc-pCVTZ(Ca) cc-pVTZ(O) and aug-cc-pVTZ(H) for C-MP2.

|                                                   |    | <b>MP2</b>              |           |           | <b>C-MP2</b>            |           |           |           |
|---------------------------------------------------|----|-------------------------|-----------|-----------|-------------------------|-----------|-----------|-----------|
| <b>H<sub>2</sub>O</b>                             |    | <b>-76.3256020000</b>   |           |           | <b>-76.3256020000</b>   |           |           |           |
|                                                   | O  | -0.000000               | 0.000000  | 0.118137  | O                       | 0.000000  | -0.000000 | 0.118137  |
|                                                   | H  | -0.000000               | 0.757376  | -0.472549 | H                       | -0.000000 | 0.757376  | -0.472549 |
|                                                   | H  | 0.000000                | -0.757376 | -0.472549 | H                       | -0.000000 | -0.757376 | -0.472549 |
| <b>Ca(H<sub>2</sub>O)<sub>1</sub><sup>+</sup></b> |    | <b>-752.9284159831</b>  |           |           | <b>-753.2761699291</b>  |           |           |           |
|                                                   | Ca | -0.000004               | -0.856123 | 0.000000  | Ca                      | 0.000101  | -0.820320 | 0.000000  |
|                                                   | O  | -0.000004               | 1.595483  | -0.000000 | O                       | 0.000101  | 1.523276  | -0.000000 |
|                                                   | H  | 0.000053                | 2.179295  | 0.746004  | H                       | -0.001409 | 2.110094  | 0.768458  |
|                                                   | H  | 0.000053                | 2.179295  | -0.746004 | H                       | -0.001409 | 2.110094  | -0.768458 |
| <b>Ca(H<sub>2</sub>O)<sub>2</sub><sup>+</sup></b> |    | <b>-829.2871086699</b>  |           |           | <b>-829.6399840928</b>  |           |           |           |
|                                                   | Ca | -0.000000               | 0.000031  | -0.001390 | Ca                      | -0.000001 | 0.000340  | -0.001201 |
|                                                   | O  | 2.448183                | -0.000001 | 0.001285  | O                       | 2.347656  | -0.000276 | 0.001086  |
|                                                   | H  | 3.032091                | 0.757377  | 0.006189  | H                       | 2.933411  | 0.768420  | 0.006230  |
|                                                   | H  | 3.031587                | -0.757778 | -0.002604 | H                       | 2.932420  | -0.769738 | -0.002927 |
|                                                   | O  | -2.448183               | -0.000082 | 0.001291  | O                       | -2.347655 | -0.000369 | 0.001089  |
|                                                   | H  | -3.031456               | 0.757797  | -0.002600 | H                       | -2.932650 | 0.768918  | -0.002924 |
|                                                   | H  | -3.032221               | -0.757358 | 0.006201  | H                       | -2.933178 | -0.769240 | 0.006243  |
| <b>Ca(H<sub>2</sub>O)<sub>3</sub><sup>+</sup></b> |    | <b>-905.6389758247</b>  |           |           | <b>-905.9957770612</b>  |           |           |           |
|                                                   | Ca | 0.001165                | -0.000605 | -0.000045 | Ca                      | 0.001081  | -0.000581 | -0.000046 |
|                                                   | O  | -1.551567               | -1.905862 | 0.000117  | O                       | -1.493990 | -1.819116 | 0.000144  |
|                                                   | H  | -1.918836               | -2.356606 | -0.762856 | H                       | -1.863120 | -2.268300 | -0.772528 |
|                                                   | H  | -1.918912               | -2.357079 | 0.762768  | H                       | -1.863200 | -2.268877 | 0.772438  |
|                                                   | O  | -0.878814               | 2.294360  | -0.000040 | O                       | -0.832243 | 2.201265  | 0.000009  |
|                                                   | H  | -1.086916               | 2.837874  | 0.762499  | H                       | -1.037838 | 2.745813  | 0.772171  |
|                                                   | H  | -1.087163               | 2.837021  | -0.763126 | H                       | -1.038164 | 2.744801  | -0.772788 |
|                                                   | O  | 2.428290                | -0.387347 | 0.000016  | O                       | 2.324260  | -0.381082 | -0.000060 |
|                                                   | H  | 3.002102                | -0.478968 | 0.763254  | H                       | 2.897613  | -0.474950 | 0.772929  |
|                                                   | H  | 3.003149                | -0.479340 | -0.762379 | H                       | 2.898870  | -0.475408 | -0.772046 |
| <b>Ca(H<sub>2</sub>O)<sub>4</sub><sup>+</sup></b> |    | <b>-981.9922301566</b>  |           |           | <b>-982.3509749147</b>  |           |           |           |
|                                                   | Ca | 0.135040                | -0.000027 | 0.000001  | Ca                      | 0.118134  | -0.000180 | 0.000091  |
|                                                   | O  | -0.285884               | -2.451093 | 0.000207  | O                       | -0.260128 | -2.361505 | 0.000042  |
|                                                   | H  | -0.222528               | -3.030638 | 0.765275  | H                       | -0.164120 | -2.936420 | 0.771631  |
|                                                   | H  | -0.222305               | -3.030630 | -0.764849 | H                       | -0.162997 | -2.936595 | -0.771276 |
|                                                   | O  | -2.329725               | 0.003193  | -0.000009 | O                       | -2.254412 | 0.007574  | 0.000218  |
|                                                   | H  | -2.909349               | -0.760758 | -0.000075 | H                       | -2.836199 | -0.761432 | -0.000304 |
|                                                   | H  | -2.907606               | 0.768463  | 0.000027  | H                       | -2.831596 | 0.780040  | 0.000087  |
|                                                   | O  | 2.597788                | -0.004213 | -0.000123 | O                       | 2.481886  | -0.009172 | -0.000249 |
|                                                   | H  | 3.178326                | -0.005060 | 0.766097  | H                       | 3.062315  | -0.011333 | 0.773523  |
|                                                   | H  | 3.178310                | -0.005176 | -0.766354 | H                       | 3.062147  | -0.011281 | -0.774145 |
|                                                   | O  | -0.278305               | 2.452251  | -0.000073 | O                       | -0.243182 | 2.363680  | -0.000142 |
|                                                   | H  | -0.213207               | 3.031606  | 0.764990  | H                       | -0.142895 | 2.938025  | 0.771325  |
|                                                   | H  | -0.213435               | 3.031628  | -0.765139 | H                       | -0.142646 | 2.937987  | -0.771605 |
| <b>Ca(H<sub>2</sub>O)<sub>5</sub><sup>+</sup></b> |    | <b>-1058.3454625261</b> |           |           | <b>-1058.7046349732</b> |           |           |           |
|                                                   | Ca | -0.004984               | -0.002186 | -0.750550 | Ca                      | -0.004539 | -0.004525 | -0.566849 |
|                                                   | O  | -2.436460               | 0.047351  | -0.059160 | O                       | -2.356794 | 0.047981  | 0.029191  |

|                                                   |           |           |           |                         |           |           |           |                         |           |           |           |
|---------------------------------------------------|-----------|-----------|-----------|-------------------------|-----------|-----------|-----------|-------------------------|-----------|-----------|-----------|
| H                                                 | -3.005943 | -0.700895 | -0.263082 | H                       | -2.914734 | -0.703003 | -0.211735 |                         |           |           |           |
| H                                                 | -2.974096 | 0.818096  | -0.265750 | H                       | -2.877857 | 0.824445  | -0.213571 |                         |           |           |           |
| O                                                 | -0.044478 | -2.474200 | -0.482947 | O                       | -0.042474 | -2.383988 | -0.543820 |                         |           |           |           |
| H                                                 | -0.057771 | -3.022037 | -1.274092 | H                       | -0.053254 | -2.775113 | -1.429996 |                         |           |           |           |
| H                                                 | -0.053782 | -3.083274 | 0.259742  | H                       | -0.055488 | -3.121089 | 0.079486  |                         |           |           |           |
| O                                                 | 0.048007  | 2.469959  | -0.484169 | O                       | 0.046423  | 2.375540  | -0.545421 |                         |           |           |           |
| H                                                 | 0.055170  | 3.017760  | -1.275422 | H                       | 0.050404  | 2.766451  | -1.431741 |                         |           |           |           |
| H                                                 | 0.061236  | 3.079081  | 0.258432  | H                       | 0.060289  | 3.112840  | 0.077642  |                         |           |           |           |
| O                                                 | 0.006071  | -0.000425 | 1.765344  | O                       | 0.006451  | -0.001531 | 1.840504  |                         |           |           |           |
| H                                                 | -0.758287 | 0.014712  | 2.346302  | H                       | -0.761632 | 0.013443  | 2.422167  |                         |           |           |           |
| H                                                 | 0.777829  | -0.014058 | 2.336493  | H                       | 0.783174  | -0.015834 | 2.410628  |                         |           |           |           |
| H                                                 | 2.995967  | 0.706790  | -0.286767 | H                       | 2.899663  | 0.716611  | -0.233178 |                         |           |           |           |
| H                                                 | 2.971337  | -0.812413 | -0.284624 | H                       | 2.879460  | -0.811251 | -0.233565 |                         |           |           |           |
| O                                                 | 2.431577  | -0.043570 | -0.076547 | O                       | 2.352301  | -0.040282 | 0.013462  |                         |           |           |           |
| <b>Ca(H<sub>2</sub>O)<sub>6</sub><sup>+</sup></b> |           |           |           | <b>-1134.6883791036</b> |           |           |           | <b>-1135.0554150636</b> |           |           |           |
| Ca                                                | 0.000000  | 0.000000  | 0.000000  | Ca                      | 0.000000  | 0.000000  | 0.000000  | Ca                      | 0.000000  | 0.000000  | 0.000000  |
| O                                                 | 0.000000  | -0.000000 | 2.442035  | O                       | 0.000000  | -0.000000 | 2.366874  | O                       | 0.000000  | -0.000000 | 2.366874  |
| O                                                 | 0.000000  | 2.442035  | -0.000000 | O                       | 0.000000  | 2.366874  | -0.000000 | O                       | 0.000000  | 2.366874  | -0.000000 |
| O                                                 | -0.000000 | -2.442035 | 0.000000  | O                       | -0.000000 | -2.366874 | 0.000000  | O                       | -0.000000 | -2.366874 | 0.000000  |
| O                                                 | 0.000000  | -0.000000 | -2.442035 | O                       | 0.000000  | -0.000000 | -2.366874 | O                       | 0.000000  | -0.000000 | -2.366874 |
| O                                                 | -2.442035 | 0.000000  | -0.000000 | O                       | -2.366874 | 0.000000  | -0.000000 | O                       | -2.366874 | 0.000000  | -0.000000 |
| O                                                 | 2.442035  | -0.000000 | 0.000000  | O                       | 2.366874  | -0.000000 | 0.000000  | O                       | 2.366874  | -0.000000 | 0.000000  |
| H                                                 | 3.022936  | -0.767814 | 0.000000  | H                       | 2.948767  | -0.773754 | 0.000000  | H                       | 2.948767  | -0.773754 | 0.000000  |
| H                                                 | 3.022936  | 0.767814  | -0.000000 | H                       | 2.948767  | 0.773754  | -0.000000 | H                       | 2.948767  | 0.773754  | -0.000000 |
| H                                                 | -0.000000 | -3.022936 | -0.767814 | H                       | -0.000000 | -2.948767 | -0.773754 | H                       | -0.000000 | -2.948767 | -0.773754 |
| H                                                 | -0.000000 | -3.022936 | 0.767814  | H                       | -0.000000 | -2.948767 | 0.773754  | H                       | -0.000000 | -2.948767 | 0.773754  |
| H                                                 | -0.767814 | 0.000000  | 3.022936  | H                       | -0.773754 | 0.000000  | 2.948767  | H                       | -0.773754 | 0.000000  | 2.948767  |
| H                                                 | 0.767814  | -0.000000 | 3.022936  | H                       | 0.773754  | -0.000000 | 2.948767  | H                       | 0.773754  | -0.000000 | 2.948767  |
| H                                                 | -3.022936 | 0.767814  | 0.000000  | H                       | -2.948767 | 0.773754  | -0.000000 | H                       | -2.948767 | 0.773754  | -0.000000 |
| H                                                 | -3.022936 | -0.767814 | -0.000000 | H                       | -2.948767 | -0.773754 | -0.000000 | H                       | -2.948767 | -0.773754 | -0.000000 |
| H                                                 | 0.000000  | 3.022936  | 0.767814  | H                       | 0.000000  | 2.948767  | 0.773754  | H                       | 0.000000  | 2.948767  | 0.773754  |
| H                                                 | 0.000000  | 3.022936  | -0.767814 | H                       | 0.000000  | 2.948767  | -0.773754 | H                       | 0.000000  | 2.948767  | -0.773754 |
| H                                                 | -0.767814 | 0.000000  | -3.022936 | H                       | -0.773754 | 0.000000  | -2.948767 | H                       | -0.773754 | 0.000000  | -2.948767 |
| H                                                 | 0.767814  | -0.000000 | -3.022936 | H                       | 0.773754  | -0.000000 | -2.948767 | H                       | 0.773754  | -0.000000 | -2.948767 |
| <b>Ca(H<sub>2</sub>O)<sub>7</sub><sup>+</sup></b> |           |           |           | <b>-1211.0412210000</b> |           |           |           | <b>-1211.4115750000</b> |           |           |           |
| Ca                                                | -0.020860 | 0.010663  | -0.086474 | Ca                      | 0.087227  | 0.086650  | 0.065769  | Ca                      | 0.087227  | 0.086650  | 0.065769  |
| o                                                 | 1.607465  | 0.784251  | 1.641362  | O                       | 2.212511  | 1.099036  | 0.601026  | O                       | 2.212511  | 1.099036  | 0.601026  |
| h                                                 | 1.660968  | 1.460745  | 2.318201  | H                       | 2.542752  | 1.937104  | 0.938912  | H                       | 2.542752  | 1.937104  | 0.938912  |
| h                                                 | 2.382018  | 0.226071  | 1.748458  | H                       | 2.987869  | 0.562364  | 0.402462  | H                       | 2.987869  | 0.562364  | 0.402462  |
| o                                                 | -0.556246 | 2.418486  | 0.277190  | O                       | -0.100474 | 2.203906  | -1.035660 | O                       | -0.100474 | 2.203906  | -1.035660 |
| h                                                 | -1.388857 | 2.576785  | -0.180331 | H                       | -1.030281 | 2.297559  | -1.283954 | H                       | -1.030281 | 2.297559  | -1.283954 |
| h                                                 | -0.093050 | 3.256769  | 0.291219  | H                       | 0.388200  | 2.891937  | -1.496964 | H                       | 0.388200  | 2.891937  | -1.496964 |
| o                                                 | -2.321213 | 0.752659  | -0.967940 | O                       | -2.238384 | 0.667217  | -0.435215 | O                       | -2.238384 | 0.667217  | -0.435215 |
| h                                                 | -2.211023 | 0.589219  | -1.920871 | H                       | -2.580677 | -0.081160 | -0.981871 | H                       | -2.580677 | -0.081160 | -0.981871 |
| h                                                 | -3.194474 | 0.404516  | -0.756501 | H                       | -2.943189 | 0.834747  | 0.207814  | H                       | -2.943189 | 0.834747  | 0.207814  |
| o                                                 | 1.774493  | 0.579807  | -1.811486 | O                       | -0.077974 | -0.980139 | -2.101793 | O                       | -0.077974 | -0.980139 | -2.101793 |
| h                                                 | 2.253623  | 1.393658  | -2.000702 | H                       | -0.114408 | -0.573262 | -2.981217 | H                       | -0.114408 | -0.573262 | -2.981217 |
| h                                                 | 1.286481  | 0.375860  | -2.628230 | H                       | -0.919413 | -1.505345 | -2.039650 | H                       | -0.919413 | -1.505345 | -2.039650 |
| o                                                 | -1.177559 | -2.203015 | -0.614786 | O                       | -1.125140 | -1.851321 | 0.893705  | O                       | -1.125140 | -1.851321 | 0.893705  |
| h                                                 | -1.397288 | -2.040654 | -1.548503 | H                       | -1.831635 | -1.994297 | 0.213672  | H                       | -1.831635 | -1.994297 | 0.213672  |
| h                                                 | -0.809318 | -3.092279 | -0.616167 | H                       | -0.795857 | -2.744374 | 1.075021  | H                       | -0.795857 | -2.744374 | 1.075021  |

|                                                   |    |                         |           |           |    |                         |           |           |
|---------------------------------------------------|----|-------------------------|-----------|-----------|----|-------------------------|-----------|-----------|
|                                                   | o  | 2.075179                | -1.452496 | 0.045835  | O  | 1.886653                | -1.547628 | -0.281488 |
|                                                   | h  | 2.524386                | -1.203461 | -0.772525 | H  | 1.601556                | -1.896061 | -1.140535 |
|                                                   | h  | 2.238506                | -2.392142 | 0.158126  | H  | 2.294865                | -2.286002 | 0.183206  |
|                                                   | o  | -1.326958               | -0.831724 | 1.839506  | O  | -0.532639               | 0.429331  | 2.343834  |
|                                                   | h  | -1.910885               | -1.561087 | 1.614300  | H  | -1.091890               | -0.321281 | 2.585685  |
|                                                   | h  | -1.525167               | -0.591009 | 2.745542  | H  | -0.448866               | 0.981860  | 3.126767  |
| <b>Ca(H<sub>2</sub>O)<sub>8</sub><sup>+</sup></b> |    | <b>-1287.3851542117</b> |           |           |    | <b>-1287.7548454495</b> |           |           |
|                                                   | Ca | 0.000000                | 0.000000  | 0.000842  | Ca | 0.000000                | 0.000000  | 0.000042  |
|                                                   | O  | 1.459101                | 1.460522  | -1.439957 | O  | 0.000000                | 2.003757  | -1.405415 |
|                                                   | H  | 1.833672                | 2.331077  | -1.266311 | H  | -0.303526               | 2.905049  | -1.233338 |
|                                                   | H  | 2.063898                | 1.030384  | -2.055573 | H  | 0.758711                | 2.083164  | -2.000496 |
|                                                   | O  | 0.000000                | 2.065665  | 1.439107  | O  | -1.415811               | 1.418135  | 1.405269  |
|                                                   | H  | -0.353690               | 2.945396  | 1.267908  | H  | -2.267905               | 1.840907  | 1.234186  |
|                                                   | H  | 0.730174                | 2.189745  | 2.056562  | H  | -0.935080               | 2.010208  | 2.000607  |
|                                                   | O  | -1.460522               | 1.459101  | -1.439957 | O  | -2.003757               | 0.000000  | -1.405415 |
|                                                   | H  | -2.331077               | 1.833672  | -1.266311 | H  | -2.905049               | -0.303526 | -1.233338 |
|                                                   | H  | -1.030384               | 2.063898  | -2.055573 | H  | -2.083164               | 0.758711  | -2.000496 |
|                                                   | O  | -2.065665               | 0.000000  | 1.439107  | O  | -1.418135               | -1.415811 | 1.405269  |
|                                                   | H  | -2.945396               | -0.353690 | 1.267908  | H  | -1.840907               | -2.267905 | 1.234186  |
|                                                   | H  | -2.189745               | 0.730174  | 2.056562  | H  | -2.010208               | -0.935080 | 2.000607  |
|                                                   | O  | -1.459101               | -1.460522 | -1.439957 | O  | -0.000000               | -2.003757 | -1.405415 |
|                                                   | H  | -2.063898               | -1.030384 | -2.055573 | H  | -0.758711               | -2.083164 | -2.000496 |
|                                                   | H  | -1.833672               | -2.331077 | -1.266311 | H  | 0.303526                | -2.905049 | -1.233338 |
|                                                   | O  | -0.000000               | -2.065665 | 1.439107  | O  | 1.415811                | -1.418135 | 1.405269  |
|                                                   | H  | -0.730174               | -2.189745 | 2.056562  | H  | 0.935080                | -2.010208 | 2.000607  |
|                                                   | H  | 0.353690                | -2.945396 | 1.267908  | H  | 2.267905                | -1.840907 | 1.234186  |
|                                                   | O  | 1.460522                | -1.459101 | -1.439957 | O  | 2.003757                | -0.000000 | -1.405415 |
|                                                   | H  | 1.030384                | -2.063898 | -2.055573 | H  | 2.083164                | -0.758711 | -2.000496 |
|                                                   | H  | 2.331077                | -1.833672 | -1.266311 | H  | 2.905049                | 0.303526  | -1.233338 |
|                                                   | O  | 2.065665                | -0.000000 | 1.439107  | O  | 1.418135                | 1.415811  | 1.405269  |
|                                                   | H  | 2.189745                | -0.730174 | 2.056562  | H  | 2.010208                | 0.935080  | 2.000607  |
|                                                   | H  | 2.945396                | 0.353690  | 1.267908  | H  | 1.840907                | 2.267905  | 1.234186  |

**Table S2.** MP2/aug-cc-pVTZ Optimized geometries (Cartesian coordinates in Å) and energies (a.u.) for different isomers of  $\text{Ca}(\text{H}_2\text{O})_{n=5-7}^+$ .

|                                                                                                                                                                                                                                                                                                                                                                                                                                                                                                                                                                                                                                                                                                                                                                                                                                                                                                                                                                                                                                                  |                                                                                                                                                                                                                                                                                                                                                                                                                                                                                                                                                                                                                                                                                                                                                                                                                                                                                                                                                                                                                                                                                       |
|--------------------------------------------------------------------------------------------------------------------------------------------------------------------------------------------------------------------------------------------------------------------------------------------------------------------------------------------------------------------------------------------------------------------------------------------------------------------------------------------------------------------------------------------------------------------------------------------------------------------------------------------------------------------------------------------------------------------------------------------------------------------------------------------------------------------------------------------------------------------------------------------------------------------------------------------------------------------------------------------------------------------------------------------------|---------------------------------------------------------------------------------------------------------------------------------------------------------------------------------------------------------------------------------------------------------------------------------------------------------------------------------------------------------------------------------------------------------------------------------------------------------------------------------------------------------------------------------------------------------------------------------------------------------------------------------------------------------------------------------------------------------------------------------------------------------------------------------------------------------------------------------------------------------------------------------------------------------------------------------------------------------------------------------------------------------------------------------------------------------------------------------------|
| <p style="text-align: center;"><b><math>\text{Ca}(\text{H}_2\text{O})_5^+</math></b><br/><b>-1058.3631641744</b></p> <p>Ca -0.0014900000 0.0019050000 -0.6331650000<br/> O 0.0005040000 2.4297410000 0.0492200000<br/> H -0.7589480000 2.9839510000 -0.1581910000<br/> H 0.7610960000 2.9817020000 -0.1600310000<br/> O -2.4678610000 -0.0054010000 -0.3641330000<br/> H -3.0168750000 -0.0055240000 -1.1553820000<br/> H -3.0772160000 -0.0051630000 0.3791190000<br/> O 2.4652880000 -0.0018890000 -0.3655100000<br/> H 3.0140820000 -0.0011940000 -1.1569150000<br/> H 3.0748280000 -0.0005390000 0.3776010000<br/> O 0.0004020000 -0.0001270000 1.8752800000<br/> H 0.0003800000 0.7666500000 2.4541620000<br/> H 0.0014550000 -0.7699830000 2.4500820000<br/> H 0.7657250000 -2.9766830000 -0.1600150000<br/> H -0.7543940000 -2.9814180000 -0.1586400000<br/> O 0.0041270000 -2.4260630000 0.0490820000</p>                                                                                                                                | <p style="text-align: center;"><b><math>\text{Ca}(\text{H}_2\text{O})_4@ \text{H}_2\text{O}^+</math></b><br/><b>-1058.3611351118</b></p> <p>Ca 0.0000000000 0.0000000000 0.7313920000<br/> O 0.0000000000 0.0000000000 -3.4738760000<br/> H 0.7711200000 0.0000000000 -4.0530090000<br/> H -0.7711200000 0.0000000000 -4.0530090000<br/> O 0.0000000000 1.8809490000 2.1623160000<br/> H 0.7796070000 2.2339160000 2.6142250000<br/> H -0.7796070000 2.2339160000 2.6142250000<br/> O 0.0000000000 -1.8809490000 2.1623160000<br/> H 0.7796070000 -2.2339160000 2.6142250000<br/> H -0.7796070000 -2.2339160000 2.6142250000<br/> O 0.0000000000 -1.4877370000 -1.0980790000<br/> H 0.0000000000 -2.4498590000 -1.0796150000<br/> H 0.0000000000 -1.1998440000 -2.0281370000<br/> H 0.0000000000 2.4498590000 -1.0796150000<br/> H 0.0000000000 1.1998440000 -2.0281370000<br/> O 0.0000000000 1.4877370000 -1.0980790000</p>                                                                                                                                                         |
| <p style="text-align: center;"><b><math>\text{Ca}(\text{H}_2\text{O})_6^+</math></b><br/><b>-1134.7100703858</b></p> <p>Ca 0.0000000000 0.0000000000 0.0000000000<br/> O 0.0000000000 0.0000000000 2.4403770000<br/> O 0.0000000000 2.4403770000 0.0000000000<br/> O 0.0000000000 -2.4403770000 0.0000000000<br/> O 0.0000000000 0.0000000000 -2.4403770000<br/> O -2.4403770000 0.0000000000 0.0000000000<br/> O 2.4403770000 0.0000000000 0.0000000000<br/> H 3.0218320000 -0.7681720000 0.0000000000<br/> H 3.0218320000 0.7681720000 0.0000000000<br/> H 0.0000000000 -3.0218320000 -0.7681720000<br/> H 0.0000000000 -3.0218320000 0.7681720000<br/> H -0.7681720000 0.0000000000 3.0218320000<br/> H 0.7681720000 0.0000000000 3.0218320000<br/> H -3.0218320000 0.7681720000 0.0000000000<br/> H -3.0218320000 -0.7681720000 0.0000000000<br/> H 0.0000000000 3.0218320000 0.7681720000<br/> H 0.0000000000 3.0218320000 -0.7681720000<br/> H -0.7681720000 0.0000000000 -3.0218320000<br/> H 0.7681720000 0.0000000000 -3.0218320000</p> | <p style="text-align: center;"><b><math>\text{Ca}(\text{H}_2\text{O})_5@ \text{H}_2\text{O}^+</math></b><br/><b>-1134.7161602512</b></p> <p>Ca 0.5214080000 -0.0193620000 -0.2729490000<br/> O -1.2728560000 -1.5560630000 -0.1492590000<br/> O 2.0774250000 -1.7920720000 -0.5610060000<br/> O -1.3072740000 1.4025640000 0.1993720000<br/> O 1.4846270000 2.1007930000 -0.7811460000<br/> O 1.7359650000 0.0303090000 1.7963250000<br/> O -3.6702570000 -0.1124040000 0.1174410000<br/> H -4.2408470000 -0.2202710000 0.8871920000<br/> H -4.2583510000 -0.0361350000 -0.6432300000<br/> H -1.2683270000 2.3429460000 -0.0059780000<br/> H -2.2397950000 1.1260490000 0.2049100000<br/> H -2.1997070000 -1.2647350000 -0.0785720000<br/> H -1.2700250000 -2.4391080000 -0.5340930000<br/> H 2.5909800000 -0.4178310000 1.8322500000<br/> H 1.5858180000 0.4246040000 2.6627820000<br/> H 2.2435060000 -2.7000210000 -0.2704630000<br/> H 2.3820820000 -1.7230450000 -1.4847240000<br/> H 2.1795700000 2.6185040000 -0.3519150000<br/> H 1.6858850000 2.0912740000 -1.7329910000</p> |
| <p style="text-align: center;"><b><math>\text{Ca}(\text{H}_2\text{O})_4@ 2\text{H}_2\text{O}^+</math></b><br/><b>-1134.7154682042</b></p> <p>Ca 0.0960070000 -0.9291190000 0.1880330000<br/> O 2.3428950000 -0.2754400000 -0.0920250000<br/> O 0.3398580000 -3.2363120000 -0.1478550000<br/> O -0.1459310000 1.4011260000 -0.0350620000<br/> O -2.2369990000 -0.7521770000 -0.0932060000<br/> O -2.9208380000 1.9682790000 -0.0301280000<br/> O 2.4523510000 2.5277310000 -0.0308220000</p>                                                                                                                                                                                                                                                                                                                                                                                                                                                                                                                                                      | <p style="text-align: center;"><b><math>\text{Ca}(\text{H}_2\text{O})_7^+</math></b><br/><b>-1211.065943104</b></p> <p>Ca -0.0214200000 0.0136490000 -0.0769420000<br/> O 1.6028250000 0.8326360000 1.6232800000<br/> H 1.6458830000 1.5277280000 2.2826330000<br/> H 2.3887640000 0.2922330000 1.7428320000<br/> O -0.5624450000 2.4195960000 0.2531870000<br/> H -1.4020210000 2.5706950000 -0.1955110000<br/> H -0.1009830000 3.2596710000 0.2498680000</p>                                                                                                                                                                                                                                                                                                                                                                                                                                                                                                                                                                                                                        |

|                                                                                                                                                                                                                                                                                                                                                                                                                                                                                                                                                                                                                                                                                                                                                                                                                                                                                                                                                                                                                                                                                                                                                                                                |                                                                                                                                                                                                                                                                                                                                                                                                                                                                                                                                                                                                                                                                                                                                                                                                                                                                                                                                                                                                                                                                                                                                                                                              |
|------------------------------------------------------------------------------------------------------------------------------------------------------------------------------------------------------------------------------------------------------------------------------------------------------------------------------------------------------------------------------------------------------------------------------------------------------------------------------------------------------------------------------------------------------------------------------------------------------------------------------------------------------------------------------------------------------------------------------------------------------------------------------------------------------------------------------------------------------------------------------------------------------------------------------------------------------------------------------------------------------------------------------------------------------------------------------------------------------------------------------------------------------------------------------------------------|----------------------------------------------------------------------------------------------------------------------------------------------------------------------------------------------------------------------------------------------------------------------------------------------------------------------------------------------------------------------------------------------------------------------------------------------------------------------------------------------------------------------------------------------------------------------------------------------------------------------------------------------------------------------------------------------------------------------------------------------------------------------------------------------------------------------------------------------------------------------------------------------------------------------------------------------------------------------------------------------------------------------------------------------------------------------------------------------------------------------------------------------------------------------------------------------|
| <p>H 2.8129300000 3.0203820000 -0.7770310000<br/> H 2.7855130000 2.9614350000 0.7633740000<br/> H -0.9932350000 1.8734750000 -0.0393600000<br/> H 0.5864200000 2.0372990000 -0.0395440000<br/> H 2.6064130000 0.6626630000 -0.0780480000<br/> H 3.1254100000 -0.8087070000 0.0838400000<br/> H -3.3756390000 2.3771020000 -0.7754900000<br/> H -3.3357850000 2.3228420000 0.7648250000<br/> H 0.4037000000 -3.8417230000 -0.8992030000<br/> H 0.3945610000 -3.7645790000 0.6661380000<br/> H -2.6879730000 0.1116230000 -0.0794890000<br/> H -2.8931360000 -1.4350950000 0.0821190000</p>                                                                                                                                                                                                                                                                                                                                                                                                                                                                                                                                                                                                      | <p>O -2.3296280000 0.7247870000 -0.9415510000<br/> H -2.2329120000 0.5542010000 -1.8959030000<br/> H -3.2013490000 0.3799540000 -0.7161890000<br/> O 1.7190580000 0.5455350000 -1.8575300000<br/> H 2.1915600000 1.3556560000 -2.0795200000<br/> H 1.2135320000 0.3189480000 -2.6589710000<br/> O -1.1511550000 -2.2040280000 -0.6066540000<br/> H -1.3812760000 -2.0487310000 -1.5401390000<br/> H -0.7731140000 -3.0897770000 -0.6071260000<br/> O 2.0834490000 -1.4229710000 0.0565320000<br/> H 2.5206600000 -1.1984560000 -0.7759490000<br/> H 2.2652380000 -2.3546880000 0.2048260000<br/> O -1.2826900000 -0.8517040000 1.8617610000<br/> H -1.8708000000 -1.5812640000 1.6453070000<br/> H -1.4700990000 -0.6099600000 2.7704830000</p>                                                                                                                                                                                                                                                                                                                                                                                                                                              |
| <p><b>Ca(H<sub>2</sub>O)<sub>6</sub>@H<sub>2</sub>O<sup>+</sup></b><br/> <b>-1211.0693002121</b></p> <p>Ca 0.4637300000 -0.0230700000 0.0504950000<br/> O -1.1168730000 -1.2356530000 -1.2831030000<br/> O 2.2357380000 0.6307630000 -1.4124450000<br/> O -1.1694830000 -0.3341110000 1.7371530000<br/> O -0.9530690000 1.8880780000 -0.5039760000<br/> O 2.1147420000 1.0062260000 1.4062670000<br/> O -3.1594490000 0.1945680000 -0.0268470000<br/> H -4.1184770000 0.2764040000 -0.0564060000<br/> H -2.7760110000 1.0416970000 -0.3149900000<br/> H -1.2392640000 -0.7329210000 2.6084690000<br/> H -2.0732100000 -0.1906540000 1.3906220000<br/> H -2.0280640000 -0.9843370000 -1.0399400000<br/> H -1.0521790000 -1.1298930000 -2.2420540000<br/> H 2.7892220000 1.4047500000 0.8385260000<br/> H 2.2320570000 1.3615230000 2.2933150000<br/> H 2.8781380000 0.1241580000 -1.9323610000<br/> H 1.8125770000 1.2645910000 -2.0375230000<br/> H -0.8509400000 2.7586670000 -0.0798830000<br/> H -0.6859960000 2.0290560000 -1.4516690000<br/> O 1.2036790000 -2.2842350000 0.1794210000<br/> H 1.9765490000 -2.7657620000 0.4910800000<br/> H 0.6187150000 -2.9209610000 -0.2488330000</p> | <p><b>Ca(H<sub>2</sub>O)<sub>5</sub>@2H<sub>2</sub>O<sup>+</sup></b><br/> <b>-1211.0680333089</b></p> <p>Ca 0.6071720000 0.4514460000 -0.2463820000<br/> O -3.5633720000 0.5632810000 -0.3681100000<br/> H -3.9511330000 0.4817950000 -1.2476850000<br/> H -4.2997430000 0.7037270000 0.2383320000<br/> O 1.6431680000 -1.6454620000 0.0561960000<br/> H 2.5378140000 -1.8062320000 -0.2621180000<br/> H 1.1726600000 -2.4948260000 0.1120790000<br/> O 2.8479640000 0.9377810000 -0.9039550000<br/> H 2.7521660000 1.1582840000 -1.8497320000<br/> H 3.5315890000 1.5231500000 -0.5498140000<br/> O -0.3172750000 -3.6424530000 0.2478550000<br/> H -0.3925480000 -4.1872170000 1.0395090000<br/> H -0.4729430000 -4.2324220000 -0.4985170000<br/> O -1.1664220000 2.0978050000 -0.2819890000<br/> H -1.0356480000 2.6469020000 -1.0705670000<br/> H -2.0822780000 1.7655960000 -0.3244490000<br/> O -1.2434610000 -0.9489460000 0.1693150000<br/> H -1.2030840000 -1.9169030000 0.2101360000<br/> H -2.1616000000 -0.6666300000 0.0262290000<br/> O 0.7964420000 1.8258840000 1.6996050000<br/> H 0.1306610000 2.5263240000 1.6815760000<br/> H 1.3543000000 1.9664110000 2.4713350000</p> |



**Table S3.** MP2 and C-MP2 optimized geometries (Cartesian coordinates in Å) and total energies (a.u.) of  $\text{Ca}(\text{H}_2\text{O})_{n=1-8}$ . The cc-pVTZ(Ca,O) aug-cc-pVTZ(H) basis sets are used for MP2 and cc-pCVTZ(Ca) cc-pVTZ(O) and aug-cc-pVTZ(H) for C-MP2.

|                                       |    | <b>MP2</b>              |           |           | <b>C-MP2</b>            |           |           |           |
|---------------------------------------|----|-------------------------|-----------|-----------|-------------------------|-----------|-----------|-----------|
| <b>Ca(H<sub>2</sub>O)</b>             |    | <b>-753.1125291362</b>  |           |           | <b>-753.4634537218</b>  |           |           |           |
|                                       | Ca | -0.014774               | -0.890637 | -0.000000 | Ca                      | -0.022072 | -0.842263 | 0.000000  |
|                                       | O  | -0.014774               | 1.673874  | 0.000000  | O                       | -0.022072 | 1.588514  | -0.000000 |
|                                       | H  | 0.206830                | 2.210873  | 0.767388  | H                       | 0.309012  | 2.068576  | 0.773191  |
|                                       | H  | 0.206830                | 2.210873  | -0.767388 | H                       | 0.309012  | 2.068576  | -0.773191 |
| <b>Ca(H<sub>2</sub>O)<sub>2</sub></b> |    | <b>-829.4492880312</b>  |           |           | <b>-829.8042716811</b>  |           |           |           |
|                                       | Ca | -0.000002               | -0.000298 | 0.000089  | Ca                      | 0.000002  | -0.000082 | 0.000422  |
|                                       | O  | 2.504950                | 0.000293  | 0.079789  | O                       | 2.386877  | 0.000095  | -0.093341 |
|                                       | H  | 2.972166                | -0.767057 | -0.269215 | H                       | 2.805841  | 0.773678  | 0.315877  |
|                                       | H  | 2.971840                | 0.767690  | -0.269552 | H                       | 2.805828  | -0.773624 | 0.315637  |
|                                       | O  | -2.504972               | 0.000293  | -0.080013 | O                       | -2.386960 | 0.000094  | 0.092580  |
|                                       | H  | -2.972057               | -0.767043 | 0.269217  | H                       | -2.805519 | 0.773680  | -0.317046 |
|                                       | H  | -2.971732               | 0.767675  | 0.269555  | H                       | -2.805529 | -0.773611 | -0.316816 |
| <b>Ca(H<sub>2</sub>O)<sub>3</sub></b> |    | <b>-905.7890045243</b>  |           |           | <b>-906.1463760867</b>  |           |           |           |
|                                       | Ca | 0.199290                | -0.453814 | 0.003896  | Ca                      | -0.335820 | -0.060163 | -0.024638 |
|                                       | O  | -0.717014               | 1.948808  | 0.066839  | O                       | 1.698374  | -1.365349 | -0.066759 |
|                                       | H  | -1.586815               | 1.984480  | 0.478339  | H                       | 2.414299  | -0.742014 | 0.131930  |
|                                       | H  | -0.878794               | 2.298221  | -0.818476 | H                       | 1.893149  | -2.175861 | 0.418272  |
|                                       | O  | -2.273328               | -0.839910 | 0.004342  | O                       | 1.675996  | 1.382494  | 0.023709  |
|                                       | H  | -2.555740               | -1.166525 | -0.862127 | H                       | 1.558326  | 1.964460  | -0.748986 |
|                                       | H  | -2.500072               | -1.553056 | 0.615884  | H                       | 1.477433  | 1.954552  | 0.787616  |
|                                       | O  | 2.647900                | -0.071688 | 0.003526  | O                       | -2.701712 | -0.094459 | 0.011111  |
|                                       | H  | 3.119084                | -0.308199 | -0.805316 | H                       | -3.027453 | 0.500316  | -0.687954 |
|                                       | H  | 3.156082                | -0.476313 | 0.716127  | H                       | -2.980628 | 0.320324  | 0.847395  |
| <b>Ca(H<sub>2</sub>O)<sub>4</sub></b> |    | <b>-982.1310609207</b>  |           |           | <b>-982.4910060113</b>  |           |           |           |
|                                       | Ca | -0.000009               | 0.387035  | 0.000844  | Ca                      | -0.013889 | 0.211660  | -0.086320 |
|                                       | O  | -1.589303               | -1.568742 | -0.179195 | O                       | -1.612537 | -1.599948 | 0.213165  |
|                                       | H  | -1.566666               | -2.229443 | -0.876436 | H                       | -2.455845 | -1.136113 | 0.084615  |
|                                       | H  | -2.463736               | -1.163811 | -0.226089 | H                       | -1.628755 | -1.880932 | 1.140658  |
|                                       | O  | 1.589436                | -1.568381 | 0.178871  | O                       | 1.710081  | -1.447254 | -0.292895 |
|                                       | H  | 1.568464                | -2.229708 | 0.875579  | H                       | 1.784230  | -2.392547 | -0.123267 |
|                                       | H  | 2.463835                | -1.163206 | 0.224605  | H                       | 2.540855  | -1.039801 | -0.007364 |
|                                       | O  | -2.452648               | 1.090295  | 0.156428  | O                       | -2.229216 | 1.181584  | -0.158168 |
|                                       | H  | -2.562339               | 1.759613  | -0.536642 | H                       | -2.184596 | 1.837799  | -0.879995 |
|                                       | H  | -2.540456               | 1.588501  | 0.983314  | H                       | -2.194831 | 1.717667  | 0.661148  |
|                                       | O  | 2.452498                | 1.090438  | -0.157464 | O                       | 2.161314  | 1.241489  | 0.253782  |
|                                       | H  | 2.564253                | 1.760294  | 0.534707  | H                       | 1.986540  | 1.677625  | 1.111694  |
|                                       | H  | 2.536949                | 1.588174  | -0.985035 | H                       | 2.193048  | 1.976132  | -0.388168 |
| <b>Ca(H<sub>2</sub>O)<sub>5</sub></b> |    | <b>-1058.4728279921</b> |           |           | <b>-1058.8374449500</b> |           |           |           |
|                                       | Ca | -0.200924               | -0.426689 | -0.043002 | Ca                      | 0.131323  | 0.078049  | -0.206500 |
|                                       | O  | 1.747002                | 0.660207  | 1.307693  | O                       | 2.100105  | 1.443041  | -0.029868 |
|                                       | H  | 2.395896                | -0.045077 | 1.163484  | H                       | 1.992624  | 1.786321  | 0.884709  |
|                                       | H  | 1.683729                | 0.755477  | 2.263904  | H                       | 1.969268  | 2.225372  | -0.602796 |
|                                       | O  | 0.848967                | 1.623024  | -1.168725 | O                       | -0.776373 | -1.818887 | 1.009080  |
|                                       | H  | 1.635541                | 1.846942  | -0.654454 | H                       | -0.775633 | -1.570518 | 1.948273  |

|                                       |           |           |           |                         |           |           |           |                         |  |  |  |
|---------------------------------------|-----------|-----------|-----------|-------------------------|-----------|-----------|-----------|-------------------------|--|--|--|
| H                                     | 1.145365  | 1.531281  | -2.080685 | H                       | -1.708981 | -1.940698 | 0.772205  |                         |  |  |  |
| O                                     | -2.625529 | -1.176171 | 0.014693  | O                       | -2.134658 | -0.362067 | -1.082120 |                         |  |  |  |
| H                                     | -2.676759 | -1.860705 | 0.698486  | H                       | -2.259668 | -0.270320 | -2.036976 |                         |  |  |  |
| H                                     | -2.756478 | -1.664653 | -0.811976 | H                       | -2.554903 | 0.426916  | -0.695604 |                         |  |  |  |
| O                                     | -1.704452 | 1.534365  | 0.369988  | O                       | 2.004980  | -1.416759 | -0.345661 |                         |  |  |  |
| H                                     | -1.574062 | 2.282457  | -0.219117 | H                       | 2.046530  | -2.133086 | 0.301306  |                         |  |  |  |
| H                                     | -2.619997 | 1.259072  | 0.258320  | H                       | 2.783117  | -0.863249 | -0.181241 |                         |  |  |  |
| H                                     | 2.197845  | -1.707407 | -1.287115 | H                       | -1.144296 | 2.580784  | 0.314730  |                         |  |  |  |
| H                                     | 1.888978  | -2.458072 | 0.009453  | H                       | -1.111870 | 1.724878  | 1.609974  |                         |  |  |  |
| O                                     | 2.071315  | -1.567116 | -0.333683 | O                       | -1.426886 | 1.713750  | 0.675495  |                         |  |  |  |
| <b>Ca(H<sub>2</sub>O)<sub>6</sub></b> |           |           |           | <b>-1134.8144741157</b> |           |           |           | <b>-1135.1843537168</b> |  |  |  |
| Ca                                    | -0.000371 | 0.003107  | 0.189369  | Ca                      | -0.000436 | 0.000119  | -0.179455 |                         |  |  |  |
| O                                     | 0.577008  | -2.319369 | 1.013833  | O                       | 1.637287  | -1.133549 | 1.186127  |                         |  |  |  |
| O                                     | -0.976609 | -1.757160 | -1.254987 | O                       | 0.521168  | -2.090897 | -1.206471 |                         |  |  |  |
| O                                     | 1.730960  | 1.653772  | 1.016727  | O                       | 0.163448  | 1.986760  | 1.183476  |                         |  |  |  |
| O                                     | -1.038207 | 1.736358  | -1.243882 | O                       | -2.070919 | 0.594196  | -1.208598 |                         |  |  |  |
| O                                     | 2.011287  | 0.030587  | -1.255376 | O                       | 1.552390  | 1.493662  | -1.207502 |                         |  |  |  |
| O                                     | -2.303469 | 0.651373  | 1.014618  | O                       | -1.802383 | -0.850628 | 1.184703  |                         |  |  |  |
| H                                     | -2.108500 | 0.969874  | 1.913752  | H                       | -1.615021 | -0.422562 | 2.054875  |                         |  |  |  |
| H                                     | -2.903976 | -0.094970 | 1.166071  | H                       | -1.779598 | -1.807162 | 1.389714  |                         |  |  |  |
| H                                     | 1.390780  | 2.547696  | 1.177052  | H                       | -0.676148 | 2.446327  | 1.386876  |                         |  |  |  |
| H                                     | 1.912571  | 1.317984  | 1.912351  | H                       | 0.438903  | 1.610971  | 2.054367  |                         |  |  |  |
| H                                     | 0.197464  | -2.311563 | 1.910372  | H                       | 1.172791  | -1.184715 | 2.056270  |                         |  |  |  |
| H                                     | 1.522315  | -2.468003 | 1.171640  | H                       | 2.454089  | -0.635103 | 1.390824  |                         |  |  |  |
| H                                     | 2.468624  | -0.693697 | -1.689978 | H                       | 2.440087  | 1.328495  | -1.550538 |                         |  |  |  |
| H                                     | 2.685324  | 0.532068  | -0.779479 | H                       | 1.651395  | 2.169892  | -0.515234 |                         |  |  |  |
| H                                     | -0.872530 | -2.590286 | -0.778030 | H                       | 1.056704  | -2.513546 | -0.512993 |                         |  |  |  |
| H                                     | -1.834823 | -1.796551 | -1.684657 | H                       | -0.064007 | -2.778184 | -1.550210 |                         |  |  |  |
| H                                     | -1.813100 | 2.057872  | -0.765798 | H                       | -2.705591 | 0.342227  | -0.515746 |                         |  |  |  |
| H                                     | -0.644498 | 2.502954  | -1.668145 | H                       | -2.372814 | 1.444624  | -1.552967 |                         |  |  |  |
| <b>Ca(H<sub>2</sub>O)<sub>7</sub></b> |           |           |           | <b>-1211.1609160325</b> |           |           |           | <b>-1211.5335376682</b> |  |  |  |
| Ca                                    | -0.039220 | 0.068204  | -0.062464 | Ca                      | -0.076075 | 0.038568  | -0.067308 |                         |  |  |  |
| O                                     | -2.206444 | 0.774350  | -1.050541 | O                       | -2.313090 | 0.274191  | -0.983175 |                         |  |  |  |
| H                                     | -2.443685 | 1.703886  | -1.118684 | H                       | -2.680492 | 1.165634  | -1.023464 |                         |  |  |  |
| H                                     | -2.920568 | 0.348888  | -0.561783 | H                       | -2.887269 | -0.226027 | -0.386253 |                         |  |  |  |
| O                                     | 0.035495  | 2.568344  | -0.018521 | O                       | -0.490136 | 2.442822  | 0.012625  |                         |  |  |  |
| H                                     | 0.981571  | 2.773229  | -0.031552 | H                       | 0.421680  | 2.765764  | -0.090398 |                         |  |  |  |
| H                                     | -0.299227 | 3.026567  | 0.763220  | H                       | -0.782498 | 2.810328  | 0.861542  |                         |  |  |  |
| O                                     | 2.332029  | 0.895384  | -0.192456 | O                       | 2.016806  | 1.253367  | -0.379222 |                         |  |  |  |
| H                                     | 2.742124  | 0.772771  | 0.683878  | H                       | 2.510441  | 1.131625  | 0.462853  |                         |  |  |  |
| H                                     | 2.953152  | 0.471533  | -0.802341 | H                       | 2.635756  | 0.949897  | -1.065027 |                         |  |  |  |
| O                                     | 0.056170  | 0.048544  | 2.426876  | O                       | 0.312612  | 0.171478  | 2.308965  |                         |  |  |  |
| H                                     | 0.179267  | 0.885191  | 2.904489  | H                       | 0.336575  | 1.038438  | 2.764398  |                         |  |  |  |
| H                                     | 0.809001  | -0.502397 | 2.718301  | H                       | 1.213226  | -0.210965 | 2.467873  |                         |  |  |  |
| O                                     | 1.267434  | -2.075873 | 0.074276  | O                       | 1.546119  | -1.785767 | 0.039774  |                         |  |  |  |
| H                                     | 2.072332  | -1.943731 | 0.612004  | H                       | 2.314963  | -1.455696 | 0.566705  |                         |  |  |  |
| H                                     | 0.831304  | -2.833140 | 0.500352  | H                       | 1.272171  | -2.596183 | 0.515751  |                         |  |  |  |
| O                                     | -1.932353 | -1.325306 | 0.858270  | O                       | -1.571760 | -1.536126 | 1.071637  |                         |  |  |  |
| H                                     | -1.757487 | -1.257310 | 1.811062  | H                       | -1.264530 | -1.337140 | 1.976641  |                         |  |  |  |
| H                                     | -1.969995 | -2.277276 | 0.688086  | H                       | -1.427622 | -2.492221 | 0.971057  |                         |  |  |  |
| O                                     | 0.334832  | -0.864174 | -2.310668 | O                       | 0.387818  | -0.782435 | -2.275750 |                         |  |  |  |

|                                       |    |                         |           |           |    |                         |           |           |
|---------------------------------------|----|-------------------------|-----------|-----------|----|-------------------------|-----------|-----------|
|                                       | H  | 0.790394                | -1.706111 | -2.179955 | H  | 0.977328                | -1.528795 | -2.079172 |
|                                       | H  | -0.281085               | -0.996327 | -3.035687 | H  | -0.225181               | -1.086269 | -2.955169 |
| <b>Ca(H<sub>2</sub>O)<sub>8</sub></b> |    | <b>-1287.5043779205</b> |           |           |    | <b>-1287.8764081051</b> |           |           |
|                                       | Ca | -0.000025               | 0.000008  | -0.000047 | Ca | 0.000002                | -0.000021 | -0.000059 |
|                                       | O  | -1.674545               | 1.175511  | -1.473729 | O  | -0.454241               | -1.940790 | -1.433073 |
|                                       | H  | -2.513856               | 1.525966  | -1.145199 | H  | -0.522129               | -2.846904 | -1.091716 |
|                                       | H  | -1.254230               | 1.909218  | -1.944815 | H  | -1.295912               | -1.765161 | -1.886146 |
|                                       | O  | -2.015206               | -0.352777 | 1.473791  | O  | 1.051277                | -1.694011 | 1.432351  |
|                                       | H  | -2.856584               | -0.698384 | 1.145409  | H  | 1.644055                | -2.382669 | 1.090967  |
|                                       | H  | -2.236661               | 0.463217  | 1.944989  | H  | 0.331968                | -2.165054 | 1.885398  |
|                                       | O  | -1.175425               | -1.674442 | -1.473871 | O  | 1.941118                | -0.453891 | -1.432755 |
|                                       | H  | -1.525832               | -2.513780 | -1.145350 | H  | 2.847167                | -0.521673 | -1.091192 |
|                                       | H  | -1.909147               | -1.254183 | -1.944983 | H  | 1.765745                | -1.295539 | -1.885975 |
|                                       | O  | 0.352750                | -2.015259 | 1.473697  | O  | 1.693694                | 1.051006  | 1.432889  |
|                                       | H  | 0.698342                | -2.856609 | 1.145221  | H  | 2.382407                | 1.643835  | 1.091694  |
|                                       | H  | -0.463265               | -2.236759 | 1.944842  | H  | 2.164673                | 0.331584  | 1.885829  |
|                                       | O  | 1.674524                | -1.175290 | -1.473894 | O  | 0.454177                | 1.941355  | -1.432324 |
|                                       | H  | 1.254211                | -1.908977 | -1.945018 | H  | 1.295870                | 1.765927  | -1.885443 |
|                                       | H  | 2.513802                | -1.525792 | -1.145318 | H  | 0.522093                | 2.847303  | -1.090517 |
|                                       | O  | 2.015197                | 0.352630  | 1.473823  | O  | -1.051324               | 1.693421  | 1.433015  |
|                                       | H  | 2.236553                | -0.463462 | 1.944902  | H  | -0.331894               | 2.164152  | 1.886204  |
|                                       | H  | 2.856610                | 0.698118  | 1.145402  | H  | -1.643925               | 2.382339  | 1.091844  |
|                                       | O  | 1.175378                | 1.674579  | -1.473772 | O  | -1.941071               | 0.454465  | -1.432677 |
|                                       | H  | 1.909001                | 1.254194  | -1.944928 | H  | -1.765458               | 1.296267  | -1.885518 |
|                                       | H  | 1.525985                | 2.513803  | -1.145176 | H  | -2.847111               | 0.522338  | -1.091117 |
|                                       | O  | -0.352638               | 2.015091  | 1.473980  | O  | -1.693698               | -1.051554 | 1.432553  |
|                                       | H  | 0.463457                | 2.236393  | 1.945074  | H  | -2.164485               | -0.332204 | 1.885804  |
|                                       | H  | -0.698160               | 2.856537  | 1.145689  | H  | -2.382568               | -1.644120 | 1.091232  |

**Table S4.** MP2/aug-cc-pVTZ Optimized geometries (Cartesian coordinates in Å) and energies (a.u.) for different isomers of  $\text{Ca}(\text{H}_2\text{O})_{n=5-7}$ .

|                                                                                                                                                                                                                                                                                                                                                                                                                                                                                                                                                                                                                                                                                                                                                  |                                                                                                                                                                                                                                                                                                                                                                                                                                                                                                                                                                                                                                                                                                                                                                    |
|--------------------------------------------------------------------------------------------------------------------------------------------------------------------------------------------------------------------------------------------------------------------------------------------------------------------------------------------------------------------------------------------------------------------------------------------------------------------------------------------------------------------------------------------------------------------------------------------------------------------------------------------------------------------------------------------------------------------------------------------------|--------------------------------------------------------------------------------------------------------------------------------------------------------------------------------------------------------------------------------------------------------------------------------------------------------------------------------------------------------------------------------------------------------------------------------------------------------------------------------------------------------------------------------------------------------------------------------------------------------------------------------------------------------------------------------------------------------------------------------------------------------------------|
| <p style="text-align: center;"><b>Ca(H<sub>2</sub>O)</b><br/><b>-753.116458635</b></p> <p>Ca 0.8856570000 -0.0000260000 0.0036820000<br/> H -2.1979530000 0.7684090000 0.1751360000<br/> H -2.2010550000 -0.7664210000 0.1756900000<br/> O -1.6642670000 -0.0001840000 -0.0530580000</p>                                                                                                                                                                                                                                                                                                                                                                                                                                                         | <p style="text-align: center;"><b>Ca(H<sub>2</sub>O)<sub>2</sub></b><br/><b>-829.45724273102</b></p> <p>Ca 0.0000000000 0.0000380000 -0.0227060000<br/> O 2.4955730000 -0.0001760000 -0.0542680000<br/> H 2.9377470000 -0.7662140000 0.3305460000<br/> H 2.9340160000 0.7680030000 0.3306630000<br/> H -2.9374250000 0.7662810000 0.3305690000<br/> H -2.9342170000 -0.7679340000 0.3307850000<br/> O -2.4955880000 0.0000640000 -0.0542870000</p>                                                                                                                                                                                                                                                                                                                 |
| <p style="text-align: center;"><b>Ca(H<sub>2</sub>O)@H<sub>2</sub>O</b><br/><b>-829.45839483075</b></p> <p>Ca 1.6464860000 -0.2902080000 0.0021310000<br/> O -2.7447260000 -0.4531700000 -0.0436240000<br/> H -2.5201200000 -1.2342540000 -0.5621290000<br/> H -3.0192530000 -0.8018080000 0.8111960000<br/> H -1.3090060000 0.6629380000 0.0094520000<br/> H -0.5796500000 1.9922360000 -0.2785070000<br/> O -0.4429860000 1.1013010000 0.0407940000</p>                                                                                                                                                                                                                                                                                        | <p style="text-align: center;"><b>Ca(H<sub>2</sub>O)<sub>3</sub></b><br/><b>-905.8003411313</b></p> <p>Ca 0.0031210000 -0.8111140000 -0.0268530000<br/> O 2.4196480000 -0.0114350000 0.0434860000<br/> H 2.9130800000 -0.2729400000 -0.7462970000<br/> H 2.8880910000 -0.4377190000 0.7745630000<br/> O -0.0080400000 1.6925030000 -0.0803540000<br/> H 0.7575520000 2.1929680000 0.2157240000<br/> H -0.7858380000 2.1771810000 0.2103970000<br/> H -2.8813990000 -0.4465990000 0.7763880000<br/> H -2.9096080000 -0.2870820000 -0.7449950000<br/> O -2.4171440000 -0.0190100000 0.0432790000</p>                                                                                                                                                                 |
| <p style="text-align: center;"><b>Ca(H<sub>2</sub>O)<sub>2</sub>@H<sub>2</sub>O</b><br/><b>-905.80212192541</b></p> <p>Ca 1.6946890000 -0.0447470000 -0.0664320000<br/> O -0.2901680000 -1.5614110000 0.0837920000<br/> H -0.3349490000 -2.4465830000 0.4380850000<br/> H -1.2045610000 -1.2342410000 0.0396490000<br/> H -0.1315570000 2.3145250000 -0.5506210000<br/> H -0.2601860000 2.0872330000 0.9556900000<br/> O -0.4079470000 1.6498910000 0.1011440000<br/> O -2.6292400000 -0.1389850000 -0.0242790000<br/> H -3.2392140000 -0.0978460000 -0.7664290000<br/> H -2.1044770000 0.6758850000 -0.0730030000</p>                                                                                                                           | <p style="text-align: center;"><b>Ca(H<sub>2</sub>O)@2H<sub>2</sub>O</b><br/><b>-905.79787050138</b></p> <p>Ca -2.0341440000 -0.0028990000 0.0022980000<br/> O 1.8161590000 -2.4760100000 0.0063880000<br/> H 1.5764590000 -3.0143990000 -0.7548790000<br/> H 1.5511430000 -3.0028250000 0.7674070000<br/> O 0.4312160000 0.0001980000 -0.0186980000<br/> H 1.0022360000 -0.7719870000 -0.0117810000<br/> H 0.9997470000 0.7741790000 -0.0112880000<br/> H 1.5702400000 3.0173550000 -0.7568300000<br/> H 1.5388200000 3.0097400000 0.7653620000<br/> O 1.8081540000 2.4815510000 0.0068160000</p>                                                                                                                                                                 |
| <p style="text-align: center;"><b>Ca(H<sub>2</sub>O)<sub>4</sub></b><br/><b>-982.1459897904</b></p> <p>Ca 0.0000860000 -0.3888760000 -0.0010960000<br/> O 2.4433130000 -1.0902200000 -0.1566310000<br/> H 2.5319100000 -1.5894680000 -0.9835260000<br/> H 2.5585910000 -1.7585150000 0.5373280000<br/> O 1.5707900000 1.5697330000 0.1813260000<br/> H 2.4523730000 1.1797190000 0.2310190000<br/> H 1.5337690000 2.2269920000 0.8820620000<br/> O -2.4426700000 -1.0910570000 0.1581300000<br/> H -2.5591310000 -1.7589090000 -0.5360670000<br/> H -2.5285080000 -1.5910940000 0.9848690000<br/> H -2.4528580000 1.1785870000 -0.2276190000<br/> H -1.5368520000 2.2253650000 -0.8830350000<br/> O -1.5715590000 1.5696480000 -0.1807140000</p> | <p style="text-align: center;"><b>Ca(H<sub>2</sub>O)<sub>3</sub>@H<sub>2</sub>O</b><br/><b>-982.14579176664</b></p> <p>Ca -0.8777300000 0.8061310000 0.0489620000<br/> O -2.8897880000 -0.7178410000 -0.0586230000<br/> H -3.5400330000 -0.4108140000 -0.7029950000<br/> H -3.3798910000 -0.7860050000 0.7707600000<br/> O 0.1641080000 -1.4494080000 0.0426840000<br/> H -0.2191070000 -2.2364520000 -0.3399360000<br/> H 1.1298660000 -1.5490760000 -0.0034250000<br/> H 1.6618420000 2.1551540000 0.6750860000<br/> H 1.6406180000 2.0561230000 -0.8556230000<br/> O 1.6077620000 1.5089420000 -0.0509550000<br/> O 2.8723930000 -1.0844150000 -0.0740650000<br/> H 3.4992590000 -1.2838810000 0.6274820000<br/> H 2.7262520000 -0.1258920000 -0.0229170000</p> |

|                                                                                                                                                                                                                                                                                                                                                                                                                                                                                                                                                                                                                                                                                                                                                                                                                                                                                                                 |                                                                                                                                                                                                                                                                                                                                                                                                                                                                                                                                                                                                                                                                                                                                                                                                                                                                                                          |
|-----------------------------------------------------------------------------------------------------------------------------------------------------------------------------------------------------------------------------------------------------------------------------------------------------------------------------------------------------------------------------------------------------------------------------------------------------------------------------------------------------------------------------------------------------------------------------------------------------------------------------------------------------------------------------------------------------------------------------------------------------------------------------------------------------------------------------------------------------------------------------------------------------------------|----------------------------------------------------------------------------------------------------------------------------------------------------------------------------------------------------------------------------------------------------------------------------------------------------------------------------------------------------------------------------------------------------------------------------------------------------------------------------------------------------------------------------------------------------------------------------------------------------------------------------------------------------------------------------------------------------------------------------------------------------------------------------------------------------------------------------------------------------------------------------------------------------------|
| <p style="text-align: center;"><b>Ca(H<sub>2</sub>O)<sub>5</sub></b><br/><b>-1058.4911179421</b></p> <p>Ca 0.1973740000 0.4047070000 -0.0319180000<br/> O -2.0502220000 1.5708630000 -0.3582670000<br/> H -2.1539660000 1.7107030000 -1.3152530000<br/> H -1.8659990000 2.4615070000 -0.0133970000<br/> O -0.8533400000 -1.6313340000 -1.1556700000<br/> H -1.1319740000 -1.5370650000 -2.0736070000<br/> H -1.6507000000 -1.8573890000 -0.6584500000<br/> O 2.6011750000 1.1960180000 0.0136240000<br/> H 2.7185260000 1.6810700000 -0.8180670000<br/> H 2.6421370000 1.8876520000 0.6919340000<br/> O -1.7600740000 -0.6432420000 1.3118770000<br/> H -2.4063850000 0.0620590000 1.1527520000<br/> H -1.6996060000 -0.7182050000 2.2705600000<br/> H 2.6423670000 -1.2363820000 0.2495570000<br/> H 1.6172160000 -2.2869040000 -0.2159110000<br/> O 1.7300740000 -1.5249550000 0.3594650000</p>               | <p style="text-align: center;"><b>Ca(H<sub>2</sub>O)<sub>4</sub>@H<sub>2</sub>O</b><br/><b>-1058.4885700036</b></p> <p>Ca 0.0000000000 0.0000000000 1.0246870000<br/> O 0.0000000000 0.0000000000 -3.4607920000<br/> H 0.7651650000 0.0000000000 -4.0471350000<br/> H -0.7651650000 0.0000000000 -4.0471350000<br/> O 0.0000000000 2.4488860000 1.6949330000<br/> H 0.7630630000 2.5414920000 2.2866010000<br/> H -0.7630630000 2.5414920000 2.2866010000<br/> O 0.0000000000 -2.4488860000 1.6949330000<br/> H 0.7630630000 -2.5414920000 2.2866010000<br/> H -0.7630630000 -2.5414920000 2.2866010000<br/> O 0.0000000000 -1.4661520000 -0.9673670000<br/> H 0.0000000000 -2.4174460000 -0.8372820000<br/> H 0.0000000000 -1.2838800000 -1.9130150000<br/> H 0.0000000000 2.4174460000 -0.8372820000<br/> H 0.0000000000 1.2838800000 -1.9130150000<br/> O 0.0000000000 1.4661520000 -0.9673670000</p> |
| <p style="text-align: center;"><b>Ca(H<sub>2</sub>O)<sub>3</sub>@2H<sub>2</sub>O</b><br/><b>-1058.4886476611</b></p> <p>Ca 0.0000440000 -1.2167340000 -0.3952640000<br/> O -2.4005230000 -1.0032370000 0.2805870000<br/> O -0.0000260000 0.7152510000 1.2648400000<br/> O 2.4005900000 -1.0031260000 0.2806720000<br/> O 2.2243050000 1.7103990000 -0.3376310000<br/> O -2.2244270000 1.7103280000 -0.3375450000<br/> H -2.7688120000 2.4774820000 -0.5554380000<br/> H -1.6549280000 1.5689640000 -1.1195400000<br/> H 0.7591100000 1.2795900000 1.0749190000<br/> H -0.7591910000 1.2795600000 1.0749450000<br/> H -2.6912580000 -0.0983730000 0.0813010000<br/> H -3.0477520000 -1.5789200000 -0.1322700000<br/> H 2.7686200000 2.4775850000 -0.5555930000<br/> H 1.6548340000 1.5689080000 -1.1196290000<br/> H 2.6912660000 -0.0982490000 0.0813560000<br/> H 3.0478720000 -1.5787780000 -0.1321460000</p> |                                                                                                                                                                                                                                                                                                                                                                                                                                                                                                                                                                                                                                                                                                                                                                                                                                                                                                          |
| <p style="text-align: center;"><b>Ca(H<sub>2</sub>O)<sub>6</sub></b><br/><b>-1134.8363108788</b></p> <p>Ca -0.0001620000 -0.0032500000 -0.1813960000<br/> O 0.4898100000 2.3278230000 -1.0202300000<br/> O -1.0373560000 1.7178410000 1.2589950000<br/> O 1.7827130000 -1.5807240000 -1.0247530000<br/> O -0.9746270000 -1.7699790000 1.2466960000<br/> O 2.0074650000 0.0397530000 1.2599190000<br/> O -2.2674930000 -0.7302220000 -1.0224830000<br/> H -2.0545640000 -1.0678560000 -1.9113590000<br/> H -2.8759860000 0.0042520000 -1.2028780000<br/> H 1.4572050000 -2.4751550000 -1.2151950000<br/> H 1.9717290000 -1.2186480000 -1.9094050000<br/> H 0.0854900000 2.3138550000 -1.9066720000<br/> H 1.4285910000 2.4904130000 -1.2060890000</p>                                                                                                                                                            | <p style="text-align: center;"><b>Ca(H<sub>2</sub>O)<sub>5</sub>@H<sub>2</sub>O</b><br/><b>-1134.836852258</b></p> <p>Ca 0.3139760000 -0.7352370000 -0.2012870000<br/> O -1.6872850000 -0.0201480000 1.1689100000<br/> O -1.5210490000 -2.4248080000 -0.4885440000<br/> O 0.6835770000 1.7969130000 0.2830270000<br/> O 2.3438600000 0.1225400000 -1.4441680000<br/> O 1.6321670000 -0.1980360000 1.8850420000<br/> O -1.9397460000 2.1758530000 -0.6503950000<br/> H -2.5545180000 2.8484880000 -0.9717470000<br/> H -1.7862090000 1.5829750000 -1.4145710000<br/> H 1.3635460000 2.0359990000 -0.3581310000<br/> H -0.1163560000 2.2637230000 -0.0082650000<br/> H -2.0752790000 0.7642640000 0.7546430000<br/> H -2.3472240000 -0.7107750000 1.0513240000</p>                                                                                                                                         |

|                                            |                                             |
|--------------------------------------------|---------------------------------------------|
| H 2.4343910000 0.7834710000 1.6938610000   | H 1.6331920000 -0.6178800000 2.7475470000   |
| H 2.7037870000 -0.4346840000 0.7872390000  | H 1.4313320000 0.7348910000 2.0314160000    |
| H -0.9672750000 2.5572280000 0.7856780000  | H -1.8398420000 -2.1283520000 -1.3608810000 |
| H -1.8979930000 1.7208100000 1.6868580000  | H -1.1753770000 -3.3121280000 -0.6585680000 |
| H -1.7380530000 -2.1238440000 0.7718920000 | H 3.1011190000 -0.4784310000 -1.4678640000  |
| H -0.5481750000 -2.5207710000 1.6688340000 | H 1.9939100000 0.1034610000 -2.3501510000   |

**Table S5.** Constrained  $C_s$  optimal geometry (Cartesian coordinates in Å) and the total energy (a.u.) of  $\text{Ca}(\text{H}_2\text{O})_6$ .

| <b>MP2</b>              |           |           |           |
|-------------------------|-----------|-----------|-----------|
| <b>-1134.8127138677</b> |           |           |           |
| Ca                      | -0.294072 | -0.008243 | 0.000000  |
| O                       | -2.291487 | -1.565968 | 0.000000  |
| O                       | 0.354034  | -2.375528 | 0.000000  |
| O                       | -0.182632 | 2.461910  | -0.000000 |
| O                       | 0.354034  | 0.537226  | 2.360687  |
| O                       | 2.189620  | 0.209249  | -0.000000 |
| O                       | 0.354034  | 0.537226  | -2.360687 |
| H                       | -0.389193 | -2.987896 | 0.000000  |
| H                       | -1.034157 | 2.922698  | -0.000000 |
| H                       | 1.161756  | -2.891572 | 0.000000  |
| H                       | 0.501373  | 3.147548  | -0.000000 |
| H                       | 2.567705  | 0.647731  | 0.769575  |
| H                       | 2.567705  | 0.647731  | -0.769575 |
| H                       | -2.841320 | -1.317859 | 0.761779  |
| H                       | -2.841320 | -1.317859 | -0.761779 |
| H                       | -0.021292 | 0.012047  | 3.078510  |
| H                       | -0.021292 | 0.012047  | -3.078510 |
| H                       | 0.005333  | 1.428666  | 2.511499  |
| H                       | 0.005333  | 1.428666  | -2.511499 |

**Table S6.** Harmonic vibrational frequencies (cm<sup>-1</sup>) at the DFT/B3LYP/cc-pVTZ(Ca,O) and aug-cc-pVTZ(H) level for the Ca(H<sub>2</sub>O)<sub>n=1-8</sub><sup>+</sup>.

| Ca(H <sub>2</sub> O) <sup>+</sup> | Ca(H <sub>2</sub> O) <sub>2</sub> <sup>+</sup> | Ca(H <sub>2</sub> O) <sub>3</sub> <sup>+</sup> | Ca(H <sub>2</sub> O) <sub>4</sub> <sup>+</sup> | Ca(H <sub>2</sub> O) <sub>5</sub> <sup>+</sup> | Ca(H <sub>2</sub> O) <sub>6</sub> <sup>+</sup> | Ca(H <sub>2</sub> O) <sub>7</sub> <sup>+</sup> | Ca(H <sub>2</sub> O) <sub>8</sub> <sup>+</sup> <sup>a</sup> |
|-----------------------------------|------------------------------------------------|------------------------------------------------|------------------------------------------------|------------------------------------------------|------------------------------------------------|------------------------------------------------|-------------------------------------------------------------|
| 322.7                             | 37.5                                           | 32.5                                           | 23.5                                           | 19.3                                           | 41.8                                           | 20.0                                           | 38.5 <i>i</i>                                               |
| 356.2                             | 45.4                                           | 32.9                                           | 57.0                                           | 24.4                                           | 41.8                                           | 30.3                                           | 37.9 <i>i</i>                                               |
| 435.5                             | 74.5                                           | 64.6                                           | 68.9                                           | 33.8                                           | 41.8                                           | 47.8                                           | 40.4                                                        |
| 1645.7                            | 265.4                                          | 145.3                                          | 69.1                                           | 44.8                                           | 52.8                                           | 55.5                                           | 41.2                                                        |
| 3712.5                            | 326.7                                          | 148.6                                          | 70.0                                           | 53.4                                           | 52.8                                           | 62.4                                           | 55.4                                                        |
| 3793.3                            | 328.7                                          | 149.1                                          | 70.2                                           | 56.8                                           | 52.8                                           | 64.7                                           | 68.7                                                        |
|                                   | 338.2                                          | 255.1                                          | 121.2                                          | 61.2                                           | 68.0                                           | 85.3                                           | 69.0                                                        |
|                                   | 394.1                                          | 291.9                                          | 151.6                                          | 99.0                                           | 68.0                                           | 101.6                                          | 80.1                                                        |
|                                   | 401.8                                          | 306.6                                          | 225.5                                          | 132.7                                          | 68.0                                           | 103.4                                          | 88.9                                                        |
|                                   | 1638.0                                         | 306.7                                          | 231.8                                          | 176.3                                          | 149.8                                          | 115.9                                          | 92.5                                                        |
|                                   | 1641.1                                         | 313.1                                          | 241.3                                          | 182.5                                          | 149.8                                          | 122.3                                          | 94.2                                                        |
|                                   | 3719.5                                         | 313.1                                          | 245.6                                          | 231.6                                          | 182.5                                          | 154.8                                          | 109.1                                                       |
|                                   | 3720.9                                         | 328.1                                          | 260.9                                          | 238.7                                          | 182.5                                          | 165.8                                          | 109.2                                                       |
|                                   | 3803.8                                         | 362.4                                          | 289.6                                          | 244.0                                          | 182.5                                          | 172.5                                          | 168.9                                                       |
|                                   | 3805.2                                         | 362.6                                          | 292.1                                          | 244.2                                          | 201.4                                          | 184.2                                          | 169.5                                                       |
|                                   |                                                | 1617.3                                         | 296.6                                          | 255.2                                          | 201.4                                          | 187.7                                          | 176.7                                                       |
|                                   |                                                | 1617.4                                         | 302.7                                          | 264.3                                          | 201.4                                          | 194.7                                          | 176.8                                                       |
|                                   |                                                | 1624.6                                         | 314.8                                          | 268.4                                          | 232.2                                          | 199.0                                          | 181.1                                                       |
|                                   |                                                | 3687.4                                         | 340.3                                          | 279.6                                          | 232.2                                          | 209.9                                          | 190.5                                                       |
|                                   |                                                | 3687.5                                         | 351.3                                          | 281.0                                          | 239.1                                          | 216.8                                          | 190.9                                                       |
|                                   |                                                | 3693.5                                         | 395.5                                          | 300.4                                          | 239.1                                          | 224.1                                          | 196.0                                                       |
|                                   |                                                | 3781.2                                         | 1610.3                                         | 305.0                                          | 239.1                                          | 228.8                                          | 198.5                                                       |
|                                   |                                                | 3781.2                                         | 1612.1                                         | 342.1                                          | 243.4                                          | 249.6                                          | 223.5                                                       |
|                                   |                                                | 3783.0                                         | 1618.4                                         | 346.8                                          | 260.0                                          | 252.9                                          | 230.8                                                       |
|                                   |                                                |                                                | 1631.8                                         | 381.5                                          | 301.9                                          | 264.6                                          | 231.1                                                       |
|                                   |                                                |                                                | 3675.2                                         | 391.8                                          | 301.9                                          | 271.1                                          | 239.2                                                       |
|                                   |                                                |                                                | 3679.2                                         | 399.2                                          | 301.9                                          | 283.3                                          | 251.6                                                       |
|                                   |                                                |                                                | 3687.5                                         | 1591.8                                         | 369.4                                          | 297.6                                          | 256.7                                                       |
|                                   |                                                |                                                | 3742.0                                         | 1593.8                                         | 369.4                                          | 302.0                                          | 256.8                                                       |
|                                   |                                                |                                                | 3774.9                                         | 1614.6                                         | 369.4                                          | 309.2                                          | 271.5                                                       |
|                                   |                                                |                                                | 3775.6                                         | 1620.1                                         | 381.2                                          | 352.8                                          | 272.2                                                       |
|                                   |                                                |                                                | 3776.9                                         | 1620.7                                         | 381.2                                          | 367.7                                          | 298.4                                                       |
|                                   |                                                |                                                | 3836.7                                         | 3604.9                                         | 381.2                                          | 380.1                                          | 299.3                                                       |
|                                   |                                                |                                                |                                                | 3611.0                                         | 1600.2                                         | 386.9                                          | 300.5                                                       |
|                                   |                                                |                                                |                                                | 3657.8                                         | 1600.2                                         | 389.3                                          | 300.8                                                       |
|                                   |                                                |                                                |                                                | 3665.4                                         | 1602.5                                         | 397.9                                          | 356.2                                                       |
|                                   |                                                |                                                |                                                | 3676.6                                         | 1602.5                                         | 398.7                                          | 365.1                                                       |
|                                   |                                                |                                                |                                                | 3703.0                                         | 1602.5                                         | 401.3                                          | 365.2                                                       |
|                                   |                                                |                                                |                                                | 3708.0                                         | 1604.8                                         | 407.1                                          | 373.6                                                       |
|                                   |                                                |                                                |                                                | 3760.9                                         | 3603.6                                         | 1580.3                                         | 390.4                                                       |
|                                   |                                                |                                                |                                                | 3761.9                                         | 3603.6                                         | 1596.2                                         | 391.3                                                       |
|                                   |                                                |                                                |                                                | 3763.3                                         | 3614.0                                         | 1599.1                                         | 391.7                                                       |
|                                   |                                                |                                                |                                                |                                                | 3614.0                                         | 1599.8                                         | 400.6                                                       |



|        |        |        |
|--------|--------|--------|
| 3614.0 | 1601.1 | 400.9  |
| 3671.3 | 1605.3 | 418.6  |
| 3713.2 | 1607.1 | 1591.7 |
| 3713.2 | 3545.3 | 1591.9 |
| 3713.2 | 3592.7 | 1592.8 |
| 3717.3 | 3597.1 | 1592.8 |
| 3717.3 | 3628.1 | 1593.9 |
| 3717.3 | 3629.1 | 1594.0 |
|        | 3671.7 | 1594.2 |
|        | 3691.7 | 1595.3 |
|        | 3703.4 | 3650.1 |
|        | 3708.2 | 3654.3 |
|        | 3715.1 | 3654.4 |
|        | 3724.6 | 3658.4 |
|        | 3780.4 | 3658.4 |
|        | 3813.1 | 3664.6 |
|        | 3818.3 | 3665.1 |
|        |        | 3698.4 |
|        |        | 3758.6 |
|        |        | 3759.7 |
|        |        | 3760.2 |
|        |        | 3761.3 |
|        |        | 3761.4 |
|        |        | 3762.4 |
|        |        | 3762.6 |
|        |        | 3763.3 |

---

<sup>a</sup> The two imaginary frequencies correspond to small rotations of water molecules. We were not able to eliminate them.

**Table S7.** Harmonic vibrational frequencies (cm<sup>-1</sup>) at the DFT/B3LYP (Ca, O: cc-pVTZ and H/aug-cc-pVTZ level for the Ca(H<sub>2</sub>O)<sub>n=1-8</sub>.

| Ca(H <sub>2</sub> O) | Ca(H <sub>2</sub> O) <sub>2</sub> | Ca(H <sub>2</sub> O) <sub>3</sub> | Ca(H <sub>2</sub> O) <sub>4</sub> | Ca(H <sub>2</sub> O) <sub>5</sub> | Ca(H <sub>2</sub> O) <sub>6</sub> | Ca(H <sub>2</sub> O) <sub>7</sub> | Ca(H <sub>2</sub> O) <sub>8</sub> |
|----------------------|-----------------------------------|-----------------------------------|-----------------------------------|-----------------------------------|-----------------------------------|-----------------------------------|-----------------------------------|
| 180.1                | 41.6                              | 28.2                              | 26.5                              | 21.5                              | 31.2                              | 26.8                              | 42.8                              |
| 261.4                | 46.1                              | 37.9                              | 35.1                              | 30.1                              | 31.9                              | 30.0                              | 44.6                              |
| 314.3                | 62.1                              | 47.0                              | 42.5                              | 38.2                              | 39.5                              | 54.4                              | 61.2                              |
| 1572.1               | 214.7                             | 57.7                              | 56.7                              | 48.7                              | 44.2                              | 64.7                              | 74.5                              |
| 3592.6               | 243.2                             | 108.8                             | 59.7                              | 54.6                              | 49.0                              | 69.4                              | 74.5                              |
| 3695.8               | 245.7                             | 118.9                             | 97.7                              | 59.6                              | 51.0                              | 75.7                              | 92.5                              |
|                      | 310.7                             | 230.9                             | 112.8                             | 64.4                              | 55.6                              | 84.3                              | 100.9                             |
|                      | 331.4                             | 245.0                             | 133.0                             | 65.4                              | 66.5                              | 98.8                              | 102.9                             |
|                      | 336.1                             | 256.5                             | 179.3                             | 79.3                              | 69.0                              | 104.9                             | 102.9                             |
|                      | 1564.7                            | 270.3                             | 223.6                             | 113.3                             | 75.6                              | 106.4                             | 115.6                             |
|                      | 1565.1                            | 293.5                             | 229.9                             | 116.0                             | 100.4                             | 120.0                             | 115.6                             |
|                      | 3579.5                            | 307.7                             | 250.0                             | 128.4                             | 100.9                             | 125.8                             | 122.8                             |
|                      | 3580.1                            | 323.5                             | 279.5                             | 142.4                             | 169.3                             | 147.1                             | 124.7                             |
|                      | 3673.4                            | 336.0                             | 288.7                             | 166.1                             | 170.3                             | 157.8                             | 171.8                             |
|                      | 3676.7                            | 360.8                             | 300.0                             | 168.1                             | 189.2                             | 182.2                             | 174.0                             |
|                      |                                   | 1551.4                            | 308.8                             | 242.1                             | 225.6                             | 193.9                             | 180.2                             |
|                      |                                   | 1553.4                            | 318.2                             | 263.3                             | 225.9                             | 204.6                             | 181.2                             |
|                      |                                   | 1560.7                            | 335.0                             | 266.9                             | 244.4                             | 210.9                             | 194.5                             |
|                      |                                   | 3533.8                            | 353.8                             | 286.3                             | 245.6                             | 215.3                             | 194.5                             |
|                      |                                   | 3542.4                            | 399.3                             | 306.2                             | 251.7                             | 234.4                             | 195.3                             |
|                      |                                   | 3571.8                            | 404.0                             | 316.3                             | 267.2                             | 248.8                             | 195.3                             |
|                      |                                   | 3622.2                            | 1534.2                            | 321.0                             | 275.6                             | 273.2                             | 213.8                             |
|                      |                                   | 3630.2                            | 1542.9                            | 348.8                             | 288.3                             | 279.6                             | 214.8                             |
|                      |                                   | 3661.7                            | 1558.8                            | 358.3                             | 288.6                             | 281.5                             | 214.8                             |
|                      |                                   |                                   | 1586.3                            | 363.8                             | 301.5                             | 296.2                             | 239.9                             |
|                      |                                   |                                   | 3483.4                            | 390.6                             | 312.3                             | 304.2                             | 251.4                             |
|                      |                                   |                                   | 3502.8                            | 428.4                             | 312.6                             | 313.1                             | 262.8                             |
|                      |                                   |                                   | 3551.8                            | 1541.1                            | 405.4                             | 337.3                             | 270.1                             |
|                      |                                   |                                   | 3568.8                            | 1541.2                            | 405.9                             | 346.9                             | 270.1                             |
|                      |                                   |                                   | 3581.6                            | 1548.4                            | 411.6                             | 349.9                             | 311.1                             |
|                      |                                   |                                   | 3639.5                            | 1551.5                            | 412.4                             | 367.8                             | 312.4                             |
|                      |                                   |                                   | 3646.1                            | 1561.0                            | 420.2                             | 372.6                             | 312.4                             |
|                      |                                   |                                   | 3748.2                            | 3451.2                            | 421.0                             | 424.4                             | 312.7                             |
|                      |                                   |                                   |                                   | 3452.5                            | 1551.3                            | 437.8                             | 343.0                             |
|                      |                                   |                                   |                                   | 3473.1                            | 1551.4                            | 441.6                             | 345.0                             |
|                      |                                   |                                   |                                   | 3487.9                            | 1557.0                            | 443.4                             | 345.0                             |
|                      |                                   |                                   |                                   | 3519.2                            | 1575.2                            | 444.7                             | 393.9                             |
|                      |                                   |                                   |                                   | 3528.3                            | 1575.4                            | 452.1                             | 423.8                             |
|                      |                                   |                                   |                                   | 3546.2                            | 1576.5                            | 461.9                             | 423.8                             |
|                      |                                   |                                   |                                   | 3551.6                            | 3461.1                            | 1546.5                            | 431.7                             |
|                      |                                   |                                   |                                   | 3569.5                            | 3461.2                            | 1552.4                            | 433.3                             |
|                      |                                   |                                   |                                   | 3573.8                            | 3494.9                            | 1565.6                            | 434.5                             |
|                      |                                   |                                   |                                   |                                   | 3540.6                            | 1570.5                            | 444.8                             |

|        |        |        |
|--------|--------|--------|
| 3540.8 | 1576.0 | 444.8  |
| 3546.2 | 1578.8 | 456.9  |
| 3580.5 | 1585.6 | 1562.2 |
| 3580.6 | 3427.0 | 1562.2 |
| 3608.8 | 3443.3 | 1562.8 |
| 3685.0 | 3477.0 | 1562.9 |
| 3685.2 | 3519.4 | 1563.1 |
| 3687.7 | 3531.1 | 1563.7 |
|        | 3542.9 | 1567.1 |
|        | 3585.7 | 1567.1 |
|        | 3611.6 | 3568.1 |
|        | 3619.7 | 3571.6 |
|        | 3638.1 | 3571.6 |
|        | 3658.1 | 3585.8 |
|        | 3660.8 | 3585.8 |
|        | 3748.0 | 3587.6 |
|        |        | 3587.7 |
|        |        | 3618.0 |
|        |        | 3661.6 |
|        |        | 3664.9 |
|        |        | 3670.6 |
|        |        | 3670.6 |
|        |        | 3672.5 |
|        |        | 3672.5 |
|        |        | 3673.0 |
|        |        | 3673.1 |

---

**Table S8.** Electron attachment energies (eV) and pole strengths (in parentheses) of  $\text{Ca}(\text{H}_2\text{O})_6^{2+}$  from diagonal electron propagator methods calculated at the geometry of  $\text{Ca}(\text{H}_2\text{O})_6^+$  using the cc-pVTZ(Ca) cc-pVTZ(O) d-aug-cc-pVTZ(H) basis sets. 1s, 2s, 2p, 3s, 3p orbitals of Ca and 1s of O were frozen.

| State ( $T_h$ ) | Config. | KT     | D2             | P3             | P3+            |
|-----------------|---------|--------|----------------|----------------|----------------|
| $1^2A_g$        | $1s^1$  | -5.528 | -6.114 (0.983) | -6.122 (0.980) | -6.122 (0.980) |
| $1^2T_u$        | $1p^1$  | -4.767 | -5.185 (0.987) | -5.195 (0.984) | -5.195 (0.984) |
|                 |         | -4.767 | -5.185 (0.987) | -5.195 (0.984) | -5.195 (0.984) |
|                 |         | -4.767 | -5.185 (0.987) | -5.195 (0.984) | -5.195 (0.984) |
| $1^2E_g$        | $1d^1$  | -4.040 | -4.418 (0.988) | -4.429 (0.986) | -4.428 (0.986) |
|                 |         | -4.040 | -4.418 (0.988) | -4.429 (0.986) | -4.428 (0.986) |
| $1^2T_g$        |         | -3.826 | -4.043 (0.992) | -4.053 (0.990) | -4.053 (0.991) |
|                 |         | -3.826 | -4.043 (0.992) | -4.053 (0.990) | -4.053 (0.991) |
|                 |         | -3.826 | -4.043 (0.992) | -4.053 (0.990) | -4.053 (0.991) |
| $2^2A_g$        | $2s^1$  | -3.199 | -3.431 (0.993) | -3.431 (0.992) | -3.431 (0.992) |
| $3^2T_u$        | $1f^1$  | -3.105 | -3.326 (0.993) | -3.335 (0.991) | -3.334 (0.991) |
|                 |         | -3.105 | -3.326 (0.993) | -3.335 (0.991) | -3.334 (0.991) |
|                 |         | -3.105 | -3.326 (0.993) | -3.335 (0.991) | -3.334 (0.991) |
| $1^2A_u$        |         | -2.841 | -3.042 (0.994) | -3.059 (0.992) | -3.058 (0.992) |
| $4^2T_u$        |         | -2.691 | -2.866 (0.994) | -2.878 (0.993) | -2.877 (0.993) |
|                 |         | -2.691 | -2.866 (0.994) | -2.878 (0.993) | -2.877 (0.993) |
|                 |         | -2.691 | -2.866 (0.994) | -2.878 (0.993) | -2.877 (0.993) |
| $2^2T_u$        | $2p^1$  | -2.832 | -3.012 (0.994) | -3.016 (0.993) | -3.016 (0.993) |
|                 |         | -2.832 | -3.012 (0.994) | -3.016 (0.993) | -3.016 (0.993) |
|                 |         | -2.832 | -3.012 (0.994) | -3.016 (0.993) | -3.016 (0.993) |
| $2^2E_g$        | $2d^1$  | -2.420 | -2.596 (0.995) | -2.598 (0.994) | -2.598 (0.994) |
|                 |         | -2.420 | -2.596 (0.995) | -2.598 (0.994) | -2.598 (0.994) |
| $2^2T_g$        |         | -2.359 | -2.531 (0.994) | -2.531 (0.993) | -2.531 (0.993) |
|                 |         | -2.359 | -2.531 (0.994) | -2.531 (0.993) | -2.531 (0.993) |
|                 |         | -2.359 | -2.531 (0.994) | -2.531 (0.993) | -2.531 (0.993) |
| $3^2T_g$        | $1g^1$  | -2.000 | -2.413 (0.987) | -2.416 (0.985) | -2.415 (0.985) |
|                 |         | -2.000 | -2.413 (0.987) | -2.416 (0.985) | -2.415 (0.985) |
|                 |         | -2.000 | -2.413 (0.987) | -2.416 (0.985) | -2.415 (0.985) |

Accuracy of the methods increases in the order of  $\text{KT} < \text{D2} < \text{P3} < \text{P3+}$  (Dolgounitcheva, O.; Díaz-Tinoco, M.; Zakrzewski, V. G.; Richard, R. M.; Marom, N.; Sherill, C. D.; Ortiz J. V. *J. Chem. Theory Comput.* **2016**, *12*, 627-637)

KT: Koopmans's theorem

D2: Diagonal second-order approximation

P3: Partial third-order quasiparticle method

P3+: Renormalized partial third-order quasiparticle method

**Table S9.** Excitation energies (eV) of  $\text{Ca}(\text{H}_2\text{O})_6^+$  inferred from electron attachment energies in Table S8.

| State ( $T_h$ ) | Config. | KT    | D2    | P3    | P3+   |
|-----------------|---------|-------|-------|-------|-------|
| $1^2A_g$        | $1s^1$  | 0.000 | 0.000 | 0.000 | 0.000 |
| $1^2T_u$        | $1p^1$  | 0.761 | 0.929 | 0.927 | 0.927 |
|                 |         | 0.761 | 0.929 | 0.927 | 0.927 |
|                 |         | 0.761 | 0.929 | 0.927 | 0.927 |
| $1^2E_g$        | $1d^1$  | 1.488 | 1.696 | 1.694 | 1.694 |
|                 |         | 1.488 | 1.696 | 1.694 | 1.694 |
| $1^2T_g$        |         | 1.702 | 2.071 | 2.069 | 2.069 |
|                 |         | 1.702 | 2.071 | 2.069 | 2.069 |
|                 |         | 1.702 | 2.071 | 2.069 | 2.069 |
| $2^2A_g$        | $2s^1$  | 2.329 | 2.683 | 2.691 | 2.691 |
| $3^2T_u$        | $1f^1$  | 2.423 | 2.788 | 2.788 | 2.788 |
|                 |         | 2.423 | 2.788 | 2.788 | 2.788 |
|                 |         | 2.423 | 2.788 | 2.788 | 2.788 |
| $1^2A_u$        |         | 2.687 | 3.072 | 3.064 | 3.064 |
| $4^2T_u$        |         | 2.837 | 3.248 | 3.245 | 3.245 |
|                 |         | 2.837 | 3.248 | 3.245 | 3.245 |
|                 |         | 2.837 | 3.248 | 3.245 | 3.245 |
| $2^2T_u$        | $2p^1$  | 2.696 | 3.102 | 3.106 | 3.106 |
|                 |         | 2.696 | 3.102 | 3.106 | 3.106 |
|                 |         | 2.696 | 3.102 | 3.106 | 3.106 |
| $2^2E_g$        | $2d^1$  | 3.108 | 3.518 | 3.524 | 3.524 |
|                 |         | 3.108 | 3.518 | 3.524 | 3.524 |
| $2^2T_g$        |         | 3.169 | 3.583 | 3.591 | 3.591 |
|                 |         | 3.169 | 3.583 | 3.591 | 3.591 |
|                 |         | 3.169 | 3.583 | 3.591 | 3.591 |
| $3^2T_g$        | $1g^1$  | 3.528 | 3.701 | 3.707 | 3.707 |
|                 |         | 3.528 | 3.701 | 3.707 | 3.707 |
|                 |         | 3.528 | 3.701 | 3.707 | 3.707 |

**Table S10.** Electron attachment energies (eV) and pole strengths (in parentheses) of  $\text{Ca}(\text{H}_2\text{O})_6^{2+}$  from diagonal electron propagator methods<sup>a</sup> calculated at the geometry of  $\text{Ca}(\text{H}_2\text{O})_6^+$  using the cc-pCVTZ(Ca) cc-pVTZ(O) d-aug-cc-pVTZ(H) basis sets. Only the 1s orbitals of Ca and O were frozen.

| State ( $T_h$ ) | Config. | KT     | D2             | P3             | P3+            |
|-----------------|---------|--------|----------------|----------------|----------------|
| $1^2A_g$        | $1s^1$  | -5.528 | -6.159 (0.982) | -6.158 (0.979) | -6.158 (0.979) |
| $1^2T_u$        | $1p^1$  | -4.767 | -5.205 (0.986) | -5.212 (0.984) | -5.211 (0.984) |
|                 |         | -4.767 | -5.205 (0.986) | -5.212 (0.984) | -5.211 (0.984) |
|                 |         | -4.767 | -5.205 (0.986) | -5.212 (0.984) | -5.211 (0.984) |
| $1^2E_g$        | $1d^1$  | -4.040 | -4.435 (0.988) | -4.445 (0.985) | -4.444 (0.986) |
|                 |         | -4.040 | -4.435 (0.988) | -4.445 (0.985) | -4.444 (0.986) |
| $1^2T_g$        |         | -3.826 | -4.055 (0.992) | -4.062 (0.990) | -4.062 (0.990) |
|                 |         | -3.826 | -4.055 (0.992) | -4.062 (0.990) | -4.062 (0.990) |
|                 |         | -3.826 | -4.055 (0.992) | -4.062 (0.990) | -4.062 (0.990) |
| $2^2A_g$        | $2s^1$  | -3.199 | -3.461 (0.992) | -3.455 (0.991) | -3.455 (0.991) |
| $3^2T_u$        | $1f^1$  | -3.105 | -3.334 (0.992) | -3.342 (0.991) | -3.341 (0.991) |
|                 |         | -3.105 | -3.334 (0.992) | -3.342 (0.991) | -3.341 (0.991) |
|                 |         | -3.105 | -3.334 (0.992) | -3.342 (0.991) | -3.341 (0.991) |
| $1^2A_u$        |         | -2.841 | -3.054 (0.994) | -3.069 (0.992) | -3.068 (0.992) |
| $4^2T_u$        |         | -2.691 | -2.873 (0.994) | -2.885 (0.993) | -2.884 (0.993) |
|                 |         | -2.691 | -2.873 (0.994) | -2.885 (0.993) | -2.884 (0.993) |
|                 |         | -2.691 | -2.873 (0.994) | -2.885 (0.993) | -2.884 (0.993) |
| $2^2T_u$        | $2p^1$  | -2.832 | -3.025 (0.994) | -3.026 (0.993) | -3.026 (0.993) |
|                 |         | -2.832 | -3.025 (0.994) | -3.026 (0.993) | -3.026 (0.993) |
|                 |         | -2.832 | -3.025 (0.994) | -3.026 (0.993) | -3.026 (0.993) |
| $2^2E_g$        | $2d^1$  | -2.420 | -2.607 (0.994) | -2.609 (0.993) | -2.608 (0.993) |
|                 |         | -2.420 | -2.607 (0.994) | -2.609 (0.993) | -2.608 (0.993) |
| $2^2T_g$        |         | -2.359 | -2.564 (0.993) | -2.559 (0.992) | -2.560 (0.992) |
|                 |         | -2.359 | -2.564 (0.993) | -2.559 (0.992) | -2.560 (0.992) |
|                 |         | -2.359 | -2.564 (0.993) | -2.559 (0.992) | -2.560 (0.992) |
| $3^2T_g$        | $1g^1$  | -2.000 | -2.536 (0.984) | -2.524 (0.982) | -2.525 (0.982) |
|                 |         | -2.000 | -2.536 (0.984) | -2.524 (0.982) | -2.525 (0.982) |
|                 |         | -2.000 | -2.536 (0.984) | -2.524 (0.982) | -2.525 (0.982) |

**Table S11.** Excitation energies (eV) of  $\text{Ca}(\text{H}_2\text{O})_6^+$  inferred from electron attachment energies in Table S10.

| State ( $T_h$ ) | Config. | KT    | D2    | P3    | P3+   |
|-----------------|---------|-------|-------|-------|-------|
| $1^2A_g$        | $1s^1$  | 0.000 | 0.000 | 0.000 | 0.000 |
| $1^2T_u$        | $1p^1$  | 0.761 | 0.954 | 0.946 | 0.947 |
|                 |         | 0.761 | 0.954 | 0.946 | 0.947 |
|                 |         | 0.761 | 0.954 | 0.946 | 0.947 |
| $1^2E_g$        | $1d^1$  | 1.488 | 1.724 | 1.713 | 1.714 |
|                 |         | 1.488 | 1.724 | 1.713 | 1.714 |
| $1^2T_g$        |         | 1.702 | 2.104 | 2.096 | 2.096 |
|                 |         | 1.702 | 2.104 | 2.096 | 2.096 |
|                 |         | 1.702 | 2.104 | 2.096 | 2.096 |
| $2^2A_g$        | $2s^1$  | 2.329 | 2.698 | 2.703 | 2.703 |
| $3^2T_u$        | $1f^1$  | 2.423 | 2.825 | 2.816 | 2.817 |
|                 |         | 2.423 | 2.825 | 2.816 | 2.817 |
|                 |         | 2.423 | 2.825 | 2.816 | 2.817 |
| $1^2A_u$        |         | 2.687 | 3.105 | 3.089 | 3.090 |
| $4^2T_u$        |         | 2.837 | 3.286 | 3.273 | 3.274 |
|                 |         | 2.837 | 3.286 | 3.273 | 3.274 |
|                 |         | 2.837 | 3.286 | 3.273 | 3.274 |
| $2^2T_u$        | $2p^1$  | 2.696 | 3.134 | 3.132 | 3.132 |
|                 |         | 2.696 | 3.134 | 3.132 | 3.132 |
|                 |         | 2.696 | 3.134 | 3.132 | 3.132 |
| $2^2E_g$        | $2d^1$  | 3.108 | 3.552 | 3.549 | 3.550 |
|                 |         | 3.108 | 3.552 | 3.549 | 3.550 |
| $2^2T_g$        |         | 3.169 | 3.595 | 3.599 | 3.598 |
|                 |         | 3.169 | 3.595 | 3.599 | 3.598 |
|                 |         | 3.169 | 3.595 | 3.599 | 3.598 |
| $3^2T_g$        | $1g^1$  | 3.528 | 3.623 | 3.634 | 3.633 |
|                 |         | 3.528 | 3.623 | 3.634 | 3.633 |
|                 |         | 3.528 | 3.623 | 3.634 | 3.633 |

**Table S12.** Electron attachment energies (eV) and pole strengths (in parentheses) of  $\text{Ca}(\text{H}_2\text{O})_8^{2+}$  from diagonal electron propagator methods calculated at the geometry of  $\text{Ca}(\text{H}_2\text{O})_8^+$  using the cc-pVTZ(Ca) cc-pVTZ(O) d-aug-cc-pVTZ(H) basis sets. 1s, 2s, 2p, 3s, 3p orbitals of Ca and 1s of O were frozen.

| State ( $C_4$ ) | Config. | KT     | D2             | P3             | P3+            |
|-----------------|---------|--------|----------------|----------------|----------------|
| $^2\text{A}$    | $1s^1$  | -5.171 | -5.766 (0.982) | -5.772 (0.979) | -5.772 (0.980) |
| $^2\text{E}$    | $1p^1$  | -4.615 | -5.053 (0.986) | -5.062 (0.983) | -5.062 (0.983) |
|                 |         | -4.615 | -5.053 (0.986) | -5.062 (0.983) | -5.062 (0.983) |
| $^2\text{A}$    |         | -4.343 | -4.752 (0.987) | -4.760 (0.984) | -4.759 (0.984) |
| $^2\text{E}$    | $1d^1$  | -3.888 | -4.197 (0.989) | -4.208 (0.987) | -4.207 (0.987) |
|                 |         | -3.888 | -4.197 (0.989) | -4.208 (0.987) | -4.207 (0.987) |
| $^2\text{E}$    |         | -3.739 | -4.063 (0.989) | -4.073 (0.987) | -4.073 (0.987) |
|                 |         | -3.739 | -4.063 (0.989) | -4.073 (0.987) | -4.073 (0.987) |
| $^2\text{A}$    |         | -3.592 | -3.807 (0.992) | -3.817 (0.991) | -3.816 (0.991) |
| $^2\text{A}$    | $2s^1$  | -2.985 | -3.219 (0.993) | -3.218 (0.992) | -3.218 (0.992) |
| $^2\text{E}$    | $1f^1$  | -3.074 | -3.296 (0.993) | -3.308 (0.991) | -3.307 (0.991) |
|                 |         | -3.074 | -3.296 (0.993) | -3.308 (0.991) | -3.307 (0.991) |
| $^2\text{E}$    |         | -2.972 | -3.190 (0.993) | -3.201 (0.991) | -3.200 (0.991) |
|                 |         | -2.972 | -3.190 (0.993) | -3.201 (0.991) | -3.200 (0.991) |
| $^2\text{E}$    |         | -2.865 | -3.040 (0.994) | -3.050 (0.992) | -3.049 (0.993) |
|                 |         | -2.865 | -3.040 (0.994) | -3.050 (0.992) | -3.049 (0.993) |
| $^2\text{A}$    |         | -2.834 | -3.012 (0.994) | -3.022 (0.993) | -3.022 (0.993) |
| $^2\text{E}$    | $2p^1$  | -2.696 | -2.882 (0.994) | -2.884 (0.993) | -2.884 (0.993) |
|                 |         | -2.696 | -2.882 (0.994) | -2.884 (0.993) | -2.884 (0.993) |
| $^2\text{A}$    |         | -2.595 | -2.789 (0.994) | -2.790 (0.993) | -2.790 (0.993) |



**Table S13.** Excitation energies (eV) of  $\text{Ca}(\text{H}_2\text{O})_8^+$  inferred from electron attachment energies in Table S12.

| State<br>( $C_4$ ) | Config. | KT    | D2    | P3    | P3+   |
|--------------------|---------|-------|-------|-------|-------|
| $^2A$              | $1s^1$  | 0.000 | 0.000 | 0.000 | 0.000 |
| $^2E$              | $1p^1$  | 0.556 | 0.713 | 0.710 | 0.710 |
|                    |         | 0.556 | 0.713 | 0.710 | 0.710 |
| $^2A$              |         | 0.828 | 1.014 | 1.012 | 1.013 |
| $^2E$              | $1d^1$  | 1.283 | 1.569 | 1.564 | 1.565 |
|                    |         | 1.283 | 1.569 | 1.564 | 1.565 |
| $^2E$              |         | 1.432 | 1.703 | 1.699 | 1.699 |
|                    |         | 1.432 | 1.703 | 1.699 | 1.699 |
| $^2A$              |         | 1.579 | 1.959 | 1.955 | 1.956 |
| $^2A$              | $2s^1$  | 2.186 | 2.547 | 2.554 | 2.554 |
| $^2E$              | $1f^1$  | 2.097 | 2.470 | 2.464 | 2.465 |
|                    |         | 2.097 | 2.470 | 2.464 | 2.465 |
| $^2E$              |         | 2.199 | 2.576 | 2.571 | 2.572 |
|                    |         | 2.199 | 2.576 | 2.571 | 2.572 |
| $^2E$              |         | 2.306 | 2.726 | 2.722 | 2.723 |
|                    |         | 2.306 | 2.726 | 2.722 | 2.723 |
| $^2A$              |         | 2.337 | 2.754 | 2.750 | 2.750 |
| $^2E$              | $2p^1$  | 2.475 | 2.884 | 2.888 | 2.888 |
|                    |         | 2.475 | 2.884 | 2.888 | 2.888 |
| $^2A$              |         | 2.576 | 2.977 | 2.982 | 2.982 |

**Table S14.** Electron attachment energies (eV) and pole strengths (in parentheses) of  $\text{Ca}(\text{H}_2\text{O})_8^{2+}$  from diagonal electron propagator methods calculated at the geometry of  $\text{Ca}(\text{H}_2\text{O})_8^+$  using the cc-pCVTZ(Ca) cc-pVTZ(O) d-aug-cc-pVTZ(H) basis sets. Only the 1s orbitals of Ca and O were frozen.

| State<br>( $C_4$ ) | Config. | KT     | D2             | P3             | P3+            |
|--------------------|---------|--------|----------------|----------------|----------------|
| $^2A$              | $1s^1$  | -5.171 | -5.792 (0.982) | -5.792 (0.979) | -5.792 (0.979) |
| $^2E$              | $1p^1$  | -4.615 | -5.066 (0.985) | -5.073 (0.983) | -5.072 (0.983) |
|                    |         | -4.615 | -5.066 (0.985) | -5.073 (0.983) | -5.072 (0.983) |
| $^2A$              |         | -4.343 | -4.765 (0.986) | -4.77 (0.984)  | -4.77 (0.984)  |
| $^2E$              | $1d^1$  | -3.888 | -4.206 (0.989) | -4.215 (0.987) | -4.215 (0.987) |
|                    |         | -3.888 | -4.206 (0.989) | -4.215 (0.987) | -4.215 (0.987) |
| $^2E$              |         | -3.739 | -4.073 (0.989) | -4.082 (0.987) | -4.081 (0.987) |
|                    |         | -3.739 | -4.073 (0.989) | -4.082 (0.987) | -4.081 (0.987) |
| $^2A$              |         | -3.592 | -3.815 (0.992) | -3.823 (0.991) | -3.822 (0.991) |
| $^2A$              | $2s^1$  | -2.985 | -3.234 (0.993) | -3.229 (0.992) | -3.230 (0.992) |
| $^2E$              | $1f^1$  | -3.074 | -3.304 (0.992) | -3.315 (0.991) | -3.314 (0.991) |
|                    |         | -3.074 | -3.304 (0.992) | -3.315 (0.991) | -3.314 (0.991) |
| $^2E$              |         | -2.972 | -3.199 (0.993) | -3.209 (0.991) | -3.208 (0.991) |
|                    |         | -2.972 | -3.199 (0.993) | -3.209 (0.991) | -3.208 (0.991) |
| $^2E$              |         | -2.865 | -3.045 (0.994) | -3.054 (0.992) | -3.054 (0.992) |
|                    |         | -2.865 | -3.045 (0.994) | -3.054 (0.992) | -3.054 (0.992) |
| $^2A$              |         | -2.834 | -3.018 (0.994) | -3.028 (0.993) | -3.027 (0.993) |
| $^2E$              | $2p^1$  | -2.696 | -2.889 (0.994) | -2.889 (0.993) | -2.889 (0.993) |
|                    |         | -2.696 | -2.889 (0.994) | -2.889 (0.993) | -2.889 (0.993) |
| $^2A$              |         | -2.595 | -2.798 (0.994) | -2.796 (0.993) | -2.796 (0.993) |

**Table S15.** Excitation energies (eV) of  $\text{Ca}(\text{H}_2\text{O})_8^+$  inferred from electron attachment energies in Table S14.

| State<br>( $C_4$ ) | Config. | KT    | D2    | P3    | P3+   |
|--------------------|---------|-------|-------|-------|-------|
| $^2A$              | $1s^1$  | 0.000 | 0.000 | 0.000 | 0.000 |
| $^2E$              | $1p^1$  | 0.556 | 0.726 | 0.719 | 0.720 |
|                    |         | 0.556 | 0.726 | 0.719 | 0.720 |
| $^2A$              |         | 0.828 | 1.027 | 1.022 | 1.022 |
| $^2E$              | $1d^1$  | 1.283 | 1.586 | 1.577 | 1.577 |
|                    |         | 1.283 | 1.586 | 1.577 | 1.577 |
| $^2E$              |         | 1.432 | 1.719 | 1.710 | 1.711 |
|                    |         | 1.432 | 1.719 | 1.710 | 1.711 |
| $^2A$              |         | 1.579 | 1.977 | 1.969 | 1.970 |
| $^2A$              | $2s^1$  | 2.186 | 2.558 | 2.563 | 2.562 |
| $^2E$              | $1f^1$  | 2.097 | 2.488 | 2.477 | 2.478 |
|                    |         | 2.097 | 2.488 | 2.477 | 2.478 |
| $^2E$              |         | 2.199 | 2.593 | 2.583 | 2.584 |
|                    |         | 2.199 | 2.593 | 2.583 | 2.584 |
| $^2E$              |         | 2.306 | 2.747 | 2.738 | 2.738 |
|                    |         | 2.306 | 2.747 | 2.738 | 2.738 |
| $^2A$              |         | 2.337 | 2.774 | 2.764 | 2.765 |
| $^2E$              | $2p^1$  | 2.475 | 2.903 | 2.903 | 2.903 |
|                    |         | 2.475 | 2.903 | 2.903 | 2.903 |
| $^2A$              |         | 2.576 | 2.994 | 2.996 | 2.996 |

**Table S16.** Electron attachment energies (eV) and pole strengths (in parentheses) of  $[\text{Ca}(\text{H}_2\text{O})_6@12\text{H}_2\text{O}]^{2+}$  from diagonal electron propagator methods calculated at the geometry of  $[\text{Ca}(\text{H}_2\text{O})_6@12\text{H}_2\text{O}]^+$  using the cc-pVDZ(Ca) cc-pVDZ(O) d-aug-cc-pVDZ(H) basis sets. 1s, 2s, 2p, 3s, 3p orbitals of Ca and 1s of O were frozen.

| State<br>( $S_6$ ) | Config. | KT     | D2             | P3             | P3+            |
|--------------------|---------|--------|----------------|----------------|----------------|
| $^2A_g$            | $1s^1$  | -3.759 | -4.191 (0.986) | -4.208 (0.983) | -4.207 (0.983) |
| $^2E_u$            | $1p^1$  | -3.517 | -3.870 (0.988) | -3.888 (0.985) | -3.887 (0.985) |
| $^2E_u$            |         | -3.517 | -3.870 (0.988) | -3.888 (0.985) | -3.887 (0.985) |
| $^2A_u$            |         | -3.300 | -3.545 (0.991) | -3.562 (0.989) | -3.560 (0.989) |
| $^2E_g$            | $1d^1$  | -3.121 | -3.388 (0.990) | -3.406 (0.988) | -3.405 (0.988) |
| $^2E_g$            |         | -3.121 | -3.388 (0.990) | -3.406 (0.988) | -3.405 (0.988) |
| $^2E_g$            |         | -3.010 | -3.230 (0.992) | -3.246 (0.990) | -3.245 (0.990) |
| $^2E_g$            |         | -3.010 | -3.230 (0.992) | -3.246 (0.990) | -3.245 (0.990) |
| $^2A_g$            |         | -2.821 | -2.970 (0.994) | -2.983 (0.993) | -2.982 (0.993) |

**Table S17.** Excitation energies (eV) of  $[\text{Ca}(\text{H}_2\text{O})_6@12\text{H}_2\text{O}]^+$  inferred from electron attachment energies in Table S16.

| State<br>( $S_6$ ) | Config. | KT    | D2    | P3    | P3+   |
|--------------------|---------|-------|-------|-------|-------|
| $^2A_g$            | $1s^1$  | 0.000 | 0.000 | 0.000 | 0.000 |
| $^2E_u$            | $1p^1$  | 0.242 | 0.321 | 0.320 | 0.320 |
| $^2E_u$            |         | 0.242 | 0.321 | 0.320 | 0.320 |
| $^2A_u$            |         | 0.459 | 0.646 | 0.646 | 0.647 |
| $^2E_g$            | $1d^1$  | 0.638 | 0.803 | 0.802 | 0.802 |
| $^2E_g$            |         | 0.638 | 0.803 | 0.802 | 0.802 |
| $^2E_g$            |         | 0.749 | 0.961 | 0.962 | 0.962 |
| $^2E_g$            |         | 0.749 | 0.961 | 0.962 | 0.962 |
| $^2A_g$            |         | 0.938 | 1.221 | 1.225 | 1.225 |

**Table S18.** Electron attachment energies (eV) and pole strengths (in parentheses) of  $[\text{Ca}(\text{H}_2\text{O})_6@12\text{H}_2\text{O}]^{2+}$  from D2: Diagonal second-order approximation calculated at the geometry of  $[\text{Ca}(\text{H}_2\text{O})_6@12\text{H}_2\text{O}]^+$  using the cc-pVTZ(Ca) cc-pVTZ(O) d-aug-cc-pVTZ(H) basis sets. 1s, 2s, 2p, 3s, 3p orbitals of Ca and 1s of O were frozen.

| State<br>( $S_6$ ) | Config. | D2             |
|--------------------|---------|----------------|
| $^2A_g$            | $1s^1$  | -4.243 (0.985) |
| $^2E_u$            | $1p^1$  | -3.916 (0.987) |
| $^2E_u$            |         | -3.916 (0.987) |
| $^2A_u$            |         | -3.580 (0.990) |
| $^2E_g$            | $1d^1$  | -3.425 (0.990) |
| $^2E_g$            |         | -3.425 (0.990) |
| $^2E_g$            |         | -3.260 (0.991) |
| $^2E_g$            |         | -3.260 (0.991) |
| $^2A_g$            |         | -2.993 (0.994) |

**Table S19.** Excitation energies (eV) of  $[\text{Ca}(\text{H}_2\text{O})_6@12\text{H}_2\text{O}]^+$  inferred from electron attachment energies in Table S18.

| State<br>( $S_6$ ) | Config. | D2    |
|--------------------|---------|-------|
| $^2A_g$            | $1s^1$  | 0.000 |
| $^2E_u$            | $1p^1$  | 0.327 |
| $^2E_u$            |         | 0.327 |
| $^2A_u$            |         | 0.663 |
| $^2E_g$            | $1d^1$  | 0.818 |
| $^2E_g$            |         | 0.818 |
| $^2E_g$            |         | 0.983 |
| $^2E_g$            |         | 0.983 |
| $^2A_g$            |         | 1.250 |

**Table S20.** Cartesian coordinates (Å) of the CAM-B3LYP/aug-cc-pVTZ optimized Ca(H<sub>2</sub>O)<sub>6</sub>@12H<sub>2</sub>O<sup>+</sup> structure.

|    |           |           |           |
|----|-----------|-----------|-----------|
| Ca | 0.000000  | 0.000000  | 0.000000  |
| O  | -1.159813 | 1.554471  | 1.315858  |
| O  | -1.926118 | -0.227192 | -1.315858 |
| O  | 0.766305  | 1.781663  | -1.315858 |
| O  | -0.766305 | -1.781663 | 1.315858  |
| O  | 1.926118  | 0.227192  | 1.315858  |
| O  | 1.159813  | -1.554471 | -1.315858 |
| H  | -2.103878 | 1.493699  | 1.538009  |
| H  | -0.824473 | 2.441917  | 1.530488  |
| H  | -2.345521 | -1.075163 | -1.538009 |
| H  | -2.526998 | 0.506944  | -1.530488 |
| H  | 1.702526  | 1.934973  | -1.530488 |
| H  | 0.241642  | 2.568862  | -1.538009 |
| H  | -1.702526 | -1.934973 | 1.530488  |
| H  | -0.241642 | -2.568862 | 1.538009  |
| H  | 2.526998  | -0.506944 | 1.530488  |
| H  | 2.345521  | 1.075163  | 1.538009  |
| H  | 2.103878  | -1.493699 | -1.538009 |
| H  | 0.824473  | -2.441917 | -1.530488 |
| O  | -3.895558 | 0.991970  | 1.175411  |
| O  | 0.219244  | 3.973081  | 1.270403  |
| O  | -2.806851 | -2.877667 | -1.175411 |
| O  | -3.331167 | 2.176411  | -1.270403 |
| O  | 3.550411  | 1.796670  | -1.270403 |
| O  | -1.088708 | 3.869638  | -1.175411 |
| O  | -3.550411 | -1.796670 | 1.270403  |
| O  | 1.088708  | -3.869638 | 1.175411  |
| O  | 3.331167  | -2.176411 | 1.270403  |
| O  | 2.806851  | 2.877667  | 1.175411  |
| O  | 3.895558  | -0.991970 | -1.175411 |
| O  | -0.219244 | -3.973081 | -1.270403 |
| H  | -4.619779 | 1.382296  | 1.677713  |
| H  | -3.876854 | 1.443883  | 0.305010  |
| H  | 0.196041  | 4.699351  | 1.903312  |
| H  | 1.152246  | 3.671338  | 1.218573  |
| H  | -3.188866 | -2.635513 | -0.305010 |
| H  | -3.506993 | -3.309698 | -1.677713 |
| H  | -2.603349 | 2.833543  | -1.218573 |
| H  | -3.971737 | 2.519452  | -1.903312 |
| H  | 3.755595  | 0.837795  | -1.218573 |
| H  | 4.167778  | 2.179899  | -1.903312 |
| H  | -0.687988 | 4.079395  | -0.305010 |
| H  | -1.112786 | 4.691994  | -1.677713 |

|   |           |           |           |
|---|-----------|-----------|-----------|
| H | -4.167778 | -2.179899 | 1.903312  |
| H | -3.755595 | -0.837795 | 1.218573  |
| H | 1.112786  | -4.691994 | 1.677713  |
| H | 0.687988  | -4.079395 | 0.305010  |
| H | 3.971737  | -2.519452 | 1.903312  |
| H | 2.603349  | -2.833543 | 1.218573  |
| H | 3.506993  | 3.309698  | 1.677713  |
| H | 3.188866  | 2.635513  | 0.305010  |
| H | 3.876854  | -1.443883 | -0.305010 |
| H | 4.619779  | -1.382296 | -1.677713 |
| H | -1.152246 | -3.671338 | -1.218573 |
| H | -0.196041 | -4.699351 | -1.903312 |

**Table S21.** Electronic terms, electronic configurations (Config.), and vertical excitation energies (eV) at CASSCF and CASPT2 for several low-lying states of Ca(H<sub>2</sub>O)<sub>6</sub>.

| State<br>(C <sub>s</sub> ) | Config.                                                                           | CASSCF | CASPT2 |
|----------------------------|-----------------------------------------------------------------------------------|--------|--------|
| 1 <sup>1</sup> A'          | 1s <sup>2</sup>                                                                   | 0.00   | 0.00   |
| 1 <sup>3</sup> A'          | 1s <sup>1</sup> 1p <sup>1</sup>                                                   | 0.44   | 0.60   |
| 1 <sup>3</sup> A''         | 1s <sup>1</sup> 1p <sup>1</sup>                                                   | 0.43   | 0.64   |
| 2 <sup>3</sup> A'          | 1s <sup>1</sup> 1p <sup>1</sup>                                                   | 0.69   | 0.92   |
| 2 <sup>1</sup> A'          | 1s <sup>1</sup> 1p <sup>1</sup> /1s <sup>1</sup> 1d <sup>1</sup>                  | 0.92   | 1.14   |
| 1 <sup>1</sup> A''         | 1s <sup>1</sup> 1p <sup>1</sup> /1s <sup>1</sup> 1d <sup>1</sup>                  | 1.05   | 1.27   |
| 3 <sup>1</sup> A'          | 1s <sup>1</sup> 1p <sup>1</sup> /1s <sup>1</sup> 1d <sup>1</sup>                  | 1.04   | 1.33   |
| 2 <sup>1</sup> A''         | 1s <sup>1</sup> 1d <sup>1</sup> /1p <sup>2</sup>                                  | 1.25   | 1.58   |
| 4 <sup>1</sup> A'          | 1s <sup>1</sup> 1d <sup>1</sup> /1p <sup>2</sup>                                  | 1.28   | 1.58   |
| 3 <sup>3</sup> A'          | 1s <sup>1</sup> 1d <sup>1</sup>                                                   | 1.48   | 1.64   |
| 4 <sup>3</sup> A'          | 1s <sup>1</sup> 1d <sup>1</sup>                                                   | 1.41   | 1.68   |
| 5 <sup>1</sup> A'          | 1s <sup>1</sup> 1p <sup>1</sup> /1p <sup>2</sup> /1s <sup>1</sup> 1d <sup>1</sup> | 1.71   | 1.73   |
| 5 <sup>3</sup> A'          | 1s <sup>1</sup> 1d <sup>1</sup>                                                   | 1.60   | 1.79   |
| 2 <sup>3</sup> A''         | 1s <sup>1</sup> 1d <sup>1</sup>                                                   | 1.60   | 1.84   |
| 3 <sup>3</sup> A''         | 1s <sup>1</sup> 1d <sup>1</sup>                                                   | 1.66   | 1.89   |
| 3 <sup>1</sup> A''         | 1s <sup>1</sup> 1p <sup>1</sup> /1p <sup>2</sup> /1s <sup>1</sup> 1d <sup>1</sup> | 1.76   | 1.91   |
| 6 <sup>1</sup> A'          | 1p <sup>2</sup>                                                                   | 1.86   | 1.97   |
| 4 <sup>3</sup> A''         | 1p <sup>2</sup>                                                                   | 1.71   | 1.98   |
| 6 <sup>3</sup> A'          | 1p <sup>2</sup>                                                                   | 2.00   | 2.28   |
| 5 <sup>3</sup> A''         | 1p <sup>2</sup>                                                                   | 1.97   | 2.29   |
| 7 <sup>1</sup> A'          | 1s <sup>1</sup> 1d <sup>1</sup> /1p <sup>2</sup> /1p <sup>1</sup> 1d <sup>1</sup> | 2.23   |        |
| 4 <sup>1</sup> A''         | 1s <sup>1</sup> 1d <sup>1</sup> /1p <sup>2</sup>                                  | 2.33   | 2.56   |
| 7 <sup>3</sup> A'          | 1p <sup>1</sup> 1d <sup>1</sup>                                                   | 2.40   |        |
| 6 <sup>3</sup> A''         | 1p <sup>1</sup> 1d <sup>1</sup>                                                   | 2.41   |        |
| 8 <sup>1</sup> A'          | 1s <sup>1</sup> 1d <sup>1</sup> /1p <sup>2</sup> /1p <sup>1</sup> 1d <sup>1</sup> | 2.42   |        |
| 5 <sup>1</sup> A''         | 1p <sup>1</sup> 1d <sup>1</sup>                                                   | 2.49   | 2.84   |
| 7 <sup>3</sup> A''         | 1p <sup>1</sup> 1d <sup>1</sup>                                                   | 2.53   |        |
| 8 <sup>3</sup> A'          | 1p <sup>1</sup> 1d <sup>1</sup>                                                   | 2.57   |        |
| 9 <sup>1</sup> A'          | 1p <sup>1</sup> 1d <sup>1</sup>                                                   | 2.58   |        |
| 6 <sup>1</sup> A''         | 1p <sup>1</sup> 1d <sup>1</sup>                                                   | 2.60   | 2.96   |
| 8 <sup>3</sup> A''         | 1p <sup>1</sup> 1d <sup>1</sup>                                                   | 2.61   |        |
| 9 <sup>3</sup> A'          | 1p <sup>1</sup> 1d <sup>1</sup>                                                   | 2.66   |        |
| 7 <sup>1</sup> A''         | 1p <sup>1</sup> 1d <sup>1</sup> /1s <sup>1</sup> 1d <sup>1</sup>                  | 2.88   |        |
| 9 <sup>3</sup> A''         | 1p <sup>1</sup> 1d <sup>1</sup>                                                   | 2.90   |        |
| 8 <sup>1</sup> A''         | 1p <sup>1</sup> 1d <sup>1</sup>                                                   | 3.28   |        |
| 9 <sup>1</sup> A''         | 1p <sup>1</sup> 1d <sup>1</sup>                                                   | 3.31   |        |



**Table S22.** Electronic terms, electronic configurations (Config.), and vertical excitation energies (eV) at CASSCF and CASPT2 for several low-lying states of Ca(H<sub>2</sub>O)<sub>8</sub>.

| State<br>(S <sub>8</sub> )                                 | Config.                                                                                           | CASSCF | CASPT2 |
|------------------------------------------------------------|---------------------------------------------------------------------------------------------------|--------|--------|
| <sup>1</sup> A                                             | 1s <sup>2</sup>                                                                                   | 0.00   | 0.00   |
| <sup>3</sup> E <sub>1</sub>                                | 1s <sup>1</sup> 1p <sup>1</sup>                                                                   | 0.23   | 0.33   |
| <sup>3</sup> B                                             | 1s <sup>1</sup> 1p <sup>1</sup>                                                                   | 0.56   | 0.69   |
| <sup>1</sup> E <sub>2</sub>                                | 1s <sup>1</sup> 1d <sup>1</sup> /1p <sup>2</sup>                                                  | 0.70   | 0.93   |
| <sup>1</sup> E <sub>1</sub>                                | 1s <sup>1</sup> 1p <sup>1</sup>                                                                   | 0.89   | 0.99   |
| <sup>1</sup> E <sub>3</sub>                                | 1s <sup>1</sup> 1d <sup>1</sup> /1p <sup>2</sup>                                                  | 0.93   | 1.16   |
| <sup>1</sup> B                                             | 1s <sup>1</sup> 1p <sup>1</sup>                                                                   | 0.97   | 1.09   |
| <sup>3</sup> A                                             | 1p <sup>2</sup>                                                                                   | 0.99   | 1.21   |
| <sup>1</sup> A                                             | 1s <sup>1</sup> 1d <sup>1</sup> /1p <sup>2</sup>                                                  | 1.09   | 1.32   |
| <sup>3</sup> E <sub>3</sub>                                | 1p <sup>2</sup>                                                                                   | 1.21   | 1.43   |
| <sup>3</sup> E <sub>2</sub>                                | 1s <sup>1</sup> 1d <sup>1</sup>                                                                   | 1.31   | 1.33   |
| <sup>3</sup> E <sub>1</sub> or <sup>3</sup> E <sub>3</sub> | 1p <sup>1</sup> 1d <sup>1</sup>                                                                   | 1.40   | 1.59   |
| <sup>3</sup> E <sub>3</sub>                                | 1s <sup>1</sup> 1d <sup>1</sup>                                                                   | 1.50   |        |
| <sup>3</sup> A                                             | 1s <sup>1</sup> 1d <sup>1</sup>                                                                   | 1.54   | 1.64   |
| <sup>3</sup> E <sub>2</sub>                                | 1p <sup>1</sup> 1d <sup>1</sup>                                                                   | 1.62   |        |
| <sup>1</sup> A                                             | 1s <sup>2</sup> /1p <sup>2</sup> /1d <sup>2</sup>                                                 | 1.68   | 1.81   |
| <sup>1</sup> B                                             | 1p <sup>1</sup> 1d <sup>1</sup>                                                                   | 1.69   |        |
| <sup>1</sup> E <sub>2</sub>                                | 1p <sup>1</sup> 1d <sup>1</sup>                                                                   | 1.70   |        |
| <sup>3</sup> E <sub>1</sub>                                | 1p <sup>1</sup> 1d <sup>1</sup>                                                                   | 1.76   |        |
| <sup>1</sup> E <sub>1</sub>                                | 1p <sup>1</sup> 1d <sup>1</sup>                                                                   | 1.78   | 2.08   |
| <sup>3</sup> B                                             | 1p <sup>1</sup> 1d <sup>1</sup>                                                                   | 1.81   |        |
| <sup>1</sup> A                                             | 1s <sup>1</sup> 1d <sup>1</sup> /1p <sup>2</sup> /1d <sup>2</sup>                                 | 2.05   |        |
| <sup>1</sup> E <sub>3</sub>                                | 1s <sup>1</sup> 1d <sup>1</sup> /1p <sup>1</sup> 1p <sup>1</sup>                                  | 2.05   |        |
| <sup>3</sup> E <sub>1</sub> or <sup>3</sup> E <sub>3</sub> | 1p <sup>1</sup> 1d <sup>1</sup>                                                                   | 2.07   |        |
| <sup>3</sup> B                                             | 1p <sup>1</sup> 1d <sup>1</sup>                                                                   | 2.10   |        |
| <sup>1</sup> E <sub>2</sub>                                | 1s <sup>1</sup> 1d <sup>1</sup> /1p <sup>1</sup> 1p <sup>1</sup> /1d <sup>1</sup> 1d <sup>1</sup> | 2.20   |        |
| <sup>3</sup> E <sub>1</sub>                                | 1p <sup>1</sup> 1d <sup>1</sup>                                                                   | 2.26   |        |
| <sup>3</sup> E <sub>2</sub>                                | 1p <sup>1</sup> 1d <sup>1</sup>                                                                   | 2.29   |        |
| <sup>3</sup> B                                             | 1p <sup>1</sup> 1d <sup>1</sup>                                                                   | 2.39   |        |
